1 **Whole genome sequencing of *Neisseria meningitidis* W isolates from the Czech Republic**  
2 **recovered in 1984 – 2017**

3

4 Michal Honskus, Zuzana Okonji, Martin Musilek, Jana Kozakova and Pavla Krizova

5

6 National Reference Laboratory for Meningococcal Infections, Centre for Epidemiology and

7 Microbiology, National Institute of Public Health, Prague, Czech Republic

8

9 **Corresponding author**

10 Pavla Krizova, M.D., Ph.D.

11 National Reference Laboratory for Meningococcal Infections

12 Centre for Epidemiology and Microbiology

13 National Institute of Public Health

14 Prague

15 Czech Republic

16 e-mail: [pavla.krizova@szu.cz](mailto:pavla.krizova@szu.cz)

17

18 **Key words:**

19 Whole genome sequencing; *Neisseria meningitidis* W; Czech Republic; comparison

20 worldwide;

21

22

23

24

25

26 **Abstract**

27 **Introduction**

28 The study presents the analysis of whole genome sequence (WGS) data for *Neisseria*  
29 *meningitidis* serogroup W isolates recovered in the Czech Republic in 1984 – 2017 and their  
30 comparison with WGS data from other countries.

31 **Material and Methods**

32 Thirty-one Czech *N. meningitidis* W isolates, 22 from invasive meningococcal disease (IMD)  
33 and nine from healthy carriers were analysed. The 33-year study period was divided into three  
34 periods: 1984-1999, 2000-2009, and 2010-2017.

35 **Results**

36 Most study isolates from IMD and healthy carriers were assigned to clonal complex cc22 (n =  
37 10) in all study periods. The second leading clonal complex was cc865 (n = 8) presented by  
38 IMD (n = 7) and carriage (n = 1) isolates that emerged in the last study period, 2010 – 2017.  
39 The third clonal complex was cc11 (n = 4) including IMD isolates from the first (1984 –  
40 1999) and third (2010 – 2017) study periods. The following clonal complex was cc174 (n = 3)  
41 presented by IMD isolates from the first two study periods, i.e. 1984 – 1999 and 2000 – 2009.  
42 One isolate of each cc41/44 and cc1136 originated from healthy carriers from the second  
43 study period, 2000 - 2009. The comparison of WGS data for *N. meningitidis* W isolates  
44 recovered in the Czech Republic in the study period 1984 – 2017 and for isolates from other  
45 countries recovered in the same period showed that clonal complex cc865, ST-3342 is unique  
46 to the Czech Republic since 2010. Moreover, the comparison shows that cc11 in the Czech  
47 Republic does not comprise novel hypervirulent lineages reported from both European and  
48 non-European countries. WGS data for Czech serogroup W meningococci point to the  
49 presence of MenB vaccine antigen genes and confirm the hypothesis about the MenB vaccine  
50 potential against *N. meningitidis* serogroup W. All 31 study isolates were assigned to

51 Bexsero® Antigen Sequence Types (BAST), and seven of them were of newly described  
52 BASTs.

### 53 **Conclusions**

54 WGS analysis contributed considerably to a more detailed molecular characterization of *N.*  
55 *meningitidis* W isolates recovered in the Czech Republic over a 33-year period and allowed  
56 for a spatial and temporal comparison of these characteristics between isolates from the Czech  
57 Republic and other countries. In addition, the WGS data precised the base for the update of  
58 the recommendation for vaccination in the Czech Republic.

59

60

### 61 **Introduction**

62 The first global epidemic of invasive meningococcal disease (IMD) caused by the bacterium  
63 *Neisseria meningitidis* of serogroup W occurred in 2000 after the Hajj pilgrimage to Mecca,  
64 with cases reported in pilgrims and their close contacts from a number of countries [1]. This  
65 outbreak was due to the hypervirulent clonal complex cc11 of *N. meningitidis* W, designated  
66 the Hajj lineage [2]. After the Hajj epidemic, strains of the same clonal complex caused  
67 further outbreaks in African and South American countries [3].

68 A number of countries have recently reported serogroup W IMD cases caused by the  
69 hypervirulent clonal complex cc11 to be on the rise. The study of these isolates by the whole  
70 genome sequencing (WGS) method revealed two genetically close lineages: one is linked to  
71 the Hajj 2000 epidemic and its subsequent spread throughout the world, including to South  
72 Africa, and the other is recently reported from Latin America, England, and other countries.  
73 The European isolates serogroup W cc11 of the latter lineage are classified into two sub-  
74 lineages: original UK strain and novel 2013 UK strain [4, 5, 6, 7, 8, 9, 10]. In 2015-2016, the  
75 resurgence of *N. meningitidis* W cc11 was reported in Madagascar. Molecular

76 characterization of isolates suggests local transmission of a single genotype [11]. Outbreaks  
77 of IMD caused by serogroup W cc11 were also reported in Australia in 2013-2015. The WGS  
78 analysis identified the original UK strain as the cause of these outbreaks [12, 13].

79 The incidence of meningococcal meningitis has been reported in the Czech Republic since  
80 1943. IMD (including meningococcal meningitis) has been monitored within the national  
81 surveillance programme since 1993. The national case definition of IMD is in line with the  
82 European case definition from 2012. Isolates from 60 – 80 % of reported IMD cases are  
83 referred to the National Reference Laboratory for Meningococcal Infections in Prague (NRL)  
84 from all over the Czech Republic for confirmation and molecular characterization. In recent  
85 years, the proportion of IMD cases with the pathogen confirmed by the non-culture PCR  
86 method is on the rise (20 – 30 %). Serogroup B was prevailing most of the time while C was  
87 the leading serogroup in some years only. *N. meningitidis* of serogroup W is the cause of a  
88 low proportion of IMD cases in the Czech Republic but is associated with a high case fatality  
89 rate. It is important to monitor molecular characteristics of serogroup W isolates given the  
90 reported rise in IMD caused by hypervirulent complex cc11 of serogroup W in several  
91 countries and its ability to spread rapidly.

92 This study presents the first results of the WGS analysis of *N. meningitidis* W isolates from  
93 the Czech Republic recovered in 1984 – 2017.

## 94 **Material and methods**

### 95 **Bacterial isolates and DNA extraction**

96 All isolates of *N. meningitidis* W available in the NRL collection were analysed by whole  
97 genome sequencing. The NRL collection comprises about 5500 *N. meningitidis* isolates from  
98 IMD and healthy carriers deposited since 1971, along with their detailed characteristics and  
99 respective epidemiological and clinical data. Serogroup W isolates only represent a small  
100 proportion of strains in the NRL collection (1.24 %). The first available IMD isolate of *N.*

101 *meningitidis* W is from 1984. The study period 1984 – 2017 was divided into three intervals  
102 to reflect the gradual increase in the proportion of serogroup W isolates among the total of  
103 IMD isolates: 1984 – 1999 (0.55 %), 2000 – 2009 (1.09 %), and 2010 – 2017 (4.31 %). A  
104 total of 31 isolates were selected for WGS analysis: five IMD isolates from 1984 – 1999, 13  
105 isolates (six from IMD and seven from healthy carriers) from 2000 – 2009, and 13 isolates  
106 (11 from IMD and two from healthy carriers) from 2010 – 2017.

107 The bacterial cultures stored at -80 °C (Cryobank B, ITEST) were plated on chocolate  
108 Mueller-Hinton agar and cultured at 37° C and 5% CO<sub>2</sub> for 18 – 24 hours. The isolates were  
109 assigned to serogroups by conventional serological methods (Pastorex Meningitidis Bio-  
110 RAD, antisera *N. meningitidis* ITEST, Bio-RAD) and confirmed by RT- PCR. The following  
111 step was the isolation of deoxyribonucleic acid (DNA) using the QIAamp DNA Mini Kit  
112 (QIAGEN) according to the manufacturer's instructions.

### 113 **Whole genome sequencing and WGS data processing**

114 The whole genome sequencing of isolates of *N. meningitidis* W was conducted by the  
115 European Molecular Biology Laboratory (EMBL), Heidelberg, Germany. The Illumina  
116 MiSeq platform was used for sequencing against the reference genome sequence of *N.*  
117 *meningitidis* strain MC58. The result was overlapping sequences approximately 300 bp in  
118 length. WGS data were subsequently processed using the Velvet *de novo* Assembler software.  
119 To optimise the procedure, the Velvet-Optimiser script was used [14]. The K-mer length  
120 parameter varied between isolates from 91 to 183 (151 on average). The resultant genome  
121 contigs were submitted to the Neisseria PubMLST database ([www.pubmlst.org/neisseria/](http://www.pubmlst.org/neisseria/)),  
122 which runs the BIGSdb (Bacterial Isolate Genome Sequence Database) platform [15, 16],  
123 under the following IDs: 38989, 41191, 57208, 57209, 57211 – 57227, 57829, 57832, 57834,  
124 57836, 57841 – 57846.

### 125 **Genome analysis and WGS data visualization**

126 In the PubMLST database, the genome contigs of individual isolates were automatically  
127 scanned and characterized by allelic profile of the genes, which are determined in the NRL by  
128 conventional sequencing methods (*abcZ*, *adk*, *aroE*, *fumC*, *gdh*, *pdhC*, *pgm*, *porA*, *fetA*, *nhba*,  
129 *nadA*, and *fhbp*). Based on the allelic profile of seven MLST genes, isolates were assigned to  
130 sequence type (ST) and clonal complex (cc) [17]. Allelic variants were determined in variable  
131 regions (VR) contained in the *porA* (twice) and *fetA* (once) genes. Each unique combination  
132 of such allelic variants is called a finetype [18]. Furthermore, allelic and peptide variants of  
133 MenB vaccine antigens (*nhba*, *nadA*, and *fhbp*) were determined [19, 20, 21, 22, 23]. A  
134 Bexsero® antigen sequence type (BAST) is a unique combination of peptide variants of these  
135 genes and allelic variants of two *porA* gene variable regions [24]. New gene and peptide  
136 variants were scanned manually, added to the database, annotated, and numbered using the  
137 automated data entry tool of the BIGSdb platform.

138 Genomes were analysed and compared using the BIGSdb Genome Comparator tool, which is  
139 part of the PubMLST database [16]. WGS data for isolates were compared using the core  
140 genome cgMLST scheme v1.0 for *N. meningitidis* - (1605 loci) [25].

141 The distance matrices, which are based on the number and allelic variability of the genes  
142 contained in individual schemes, were generated automatically and phylogenetic networks  
143 were constructed using the SplitsTree4 software which uses the NeighborNet algorithm [26].

144 Phylogenetic analysis results were edited graphically by the Inkscape tool  
145 ([www.inkscape.org/en/](http://www.inkscape.org/en/)). Isolates are coloured according to detection year (yellow 1984 -  
146 1999, green 2000 – 2009, and red for 2010 – 2017).

#### 147 **Comparison of WGS data between isolates of *N. meningitidis* W from the Czech** 148 **Republic and other countries**

149 To gain a more detailed insight into the genetic diversity of the Czech isolates of serogroup W  
150 *N. meningitidis*, we compared WGS data between countries, which facilitates the study of the

151 genetic profile of the population of Czech isolates and of the relationship between their  
152 genetic diversity and geographical distribution. Using the data from the PubMLST database, a  
153 selection was made of all available European and non-European *N. meningitidis* serogroup W  
154 isolates belonging to two clonal complexes (cc11 and cc22) that are the most widespread  
155 worldwide. Only isolates for which full MLST profiles and WGS data were available  
156 (sequence bin size  $\geq 2$  Mbp) were included in the study. These criteria were met by 1094  
157 cc11 and 159 cc22 isolates from other countries.

158 The overall genetic diversity within serogroup W isolates is shown in three phylogenetic  
159 networks. Each of them represents the comparison between Czech serogroup W isolates and  
160 those from other countries, which were available in the PubMLST database. Group 1 consists  
161 exclusively of UK isolates (n = 901). Group 2 comprises isolates from continental European  
162 countries (n = 399): France (n = 136), the Netherlands (n = 110), Sweden (n = 67), Italy (n =  
163 41), Ireland (n = 21), Finland (n = 10), Portugal (n = 4), Germany, Island, and Malta (two  
164 isolates from each), Greece, Croatia, Norway, and Spain (one isolate from each). Group 3  
165 includes non-European isolates (n = 363): from the Republic of South Africa (n = 130),  
166 Canada (n = 75), Niger (n = 37), China (n = 25), Burkina Faso (n = 17), Cameroon (n = 12),  
167 Madagascar (n = 8), Turkey (n = 7), Algeria (n = 7), Mali (n = 6), USA (n = 5), Russia (n =  
168 4), and Senegal (n = 4), two isolates from each Japan, Morocco, Saudi Arabia, Togo, Benin,  
169 and Chad, and one isolate from each Mauritius, Djibouti, and Central African Republic.  
170 Eleven isolates with missing data on the place of detection were added to this group. For all of  
171 these isolates, WGS data (sequence bin size  $\geq 2$  Mbp) and full MLST profiles were  
172 available.

173 Isolates from the Czech Republic and other countries were compared using the Genome  
174 Comparator tool at the cgMLST level (1605 loci). In the phylogenetic networks, isolates are  
175 coloured according to detection year. Isolates recovered before 2000 are highlighted in

176 yellow, isolates from 2000 – 2009 in green, and isolates from 2010 – 2017 in red. The isolates  
177 from other countries with missing detection year are highlighted in grey. The study isolates  
178 from the Czech Republic are marked with squares coloured according to the study intervals  
179 and numbers under which they are registered in the NRL collection of *N. meningitidis*  
180 isolates.

## 181 **Results**

### 182 **Distribution of *N. meningitidis* W isolates from the Czech Republic and assignment to** 183 **clonal complexes**

184 First figure (Fig. 1) shows the distribution of all (part A) or IMD (part B) *N. meningitidis*  
185 serogroup W isolates from the Czech Republic by study interval. Clonal complex affiliation  
186 of isolates is highlighted in colours. Five isolates from 1984 – 1999 are exclusively from IMD  
187 and belong to three clonal complexes (cc11, cc22, and cc174), with cc11 being predominant  
188 (60 %). In 2000 – 2009, more cc22 isolates were recovered (two IMD isolates and three  
189 carriage isolates). In that period, complex 174 is represented by two IMD isolates, and three  
190 isolates were unassigned to clonal complex (ccUA) (two IMD isolates and one carriage  
191 isolate). In 2000 – 2009, three carriage isolates belonging to three different clonal complexes,  
192 cc41/44, cc53, and cc1136, were recovered. No cc11 isolate was registered in the Czech  
193 Republic in that period. In 2010 – 2017, cc22 isolates can be seen again (three IMD isolates  
194 and one carriage isolate); one IMD cc11 isolate and eight cc865 isolates emerged (seven IMD  
195 isolates and one carriage isolate).

196 Conclusion: IMD cc22 isolates were recorded throughout the all study periods, while cc11  
197 was only found in 1984 – 1999 and 2010 – 2017, and cc174 in 1984 – 1999 and 2000 - 2009.  
198 The most relevant finding is a high incidence of cc865 isolates in the last study period.

### 199 **Genetic relationships between *N. meningitidis* W isolates from the Czech Republic**



200 The generated phylogenetic network confirmed that most (81 %; n = 25) *N. meningitidis* W  
201 isolates from the Czech Republic belong to four clonal complexes: cc22 (n = 10), cc865 (n =  
202 8), cc11 (n = 4), and cc174 (n = 3). All these clonal complexes are clearly delineated in the  
203 phylogenetic network (Fig. 2).

204 The clonal complex cc865 shows the highest homogeneity, which is consistent with the fact  
205 that all isolates of this clonal complex belong to the same sequence type ST-3342 and were  
206 recovered in the most recent interval, i.e. 2010 – 2017 (one in 2011, two in 2012, three in  
207 2016, and two in 2017). Based on the data available in the PubMLST database, cc865 is  
208 uncommon in serogroup W and was only detected in seven countries (one isolate from each  
209 Germany, Spain, the Netherlands, Greece, Romania, Russia, and the Republic of South  
210 Africa). So far, sequence type ST-3342 has only been identified in the Czech Republic. All  
211 cc865 isolates from other countries (n = 7) were assigned to different sequence types. It is  
212 interesting to note that each of these cc865 isolates has a unique sequence type (ST-1232, ST-  
213 6444, ST-8172, ST-8608, ST-10799, ST-11589, and ST-12256). Therefore, it can be assumed  
214 that cc865 ST-3342 isolates from the Czech Republic originate from a common ancestor that  
215 has recently evolved in the country. The ongoing diversification of the *N. meningitidis* W  
216 cc865 ST-3342 population in the Czech Republic is demonstrated by gene changes in MenB  
217 vaccine antigens (*fhbp*, *nhba*, and *nadA*). Although all ST-3342 isolates contain a peptide  
218 variant of the *nhba* 89, two isolates from 2017 carry a same synonymous point mutation that  
219 switches allelic variant 257 to variant 1438 (Tab. 1).

220

221

222

223

224

Table 1: Molecular characterization of 31 *N. meningitidis* serogroup W isolates from the Czech Republic recovered from 1984 to 2017.

| Isolate | PubMLST ID | Clinical status | Clonal complex | Sequence type | <i>abcZ</i> | <i>adk</i> | <i>aroE</i> | <i>fumC</i> | <i>gdh</i> | <i>pdhC</i> | <i>pgm</i> | <i>porA</i> VR1 | <i>porA</i> VR2 | <i>fetA</i> VR | <i>nhba</i> peptide | <i>nhba</i> allele | <i>nadA</i> peptide | <i>nadA</i> allele | <i>nadA</i> variant | <i>fhhp</i> peptide | <i>fhhp</i> allele | <i>fhhp</i> variant | BAST type |      |
|---------|------------|-----------------|----------------|---------------|-------------|------------|-------------|-------------|------------|-------------|------------|-----------------|-----------------|----------------|---------------------|--------------------|---------------------|--------------------|---------------------|---------------------|--------------------|---------------------|-----------|------|
| 21/84   | 57208      | IMD             | cc22           | 114           | 11          | 5          | 18          | 17          | 11         | 24          | 21         | 5-2             | 10              | F3-4           | 20                  | 3                  | 0                   |                    |                     | 16                  | 16                 | A                   | 2         | 1417 |
| 165/02  | 57846      | CAR             | cc22           | 2878          | 12          | 5          | 18          | 8           | 11         | 24          | 21         | 18-1            | 3               | F4-1           | 20                  | 3                  | 0                   |                    |                     | 16                  | 16                 | A                   | 2         | 349  |
| 114/03  | 57842      | CAR             | cc22           | 2878          | 12          | 5          | 18          | 8           | 11         | 24          | 21         | 18-1            | 3               | F4-1           | 20                  | 3                  | 0                   |                    |                     | 16                  | 16                 | A                   | 2         | 349  |
| 124/03  | 57843      | CAR             | cc22           | 2878          | 12          | 5          | 18          | 8           | 11         | 24          | 21         | 18-1            | 3               | F4-1           | 20                  | 3                  | 0                   |                    |                     | 16                  | 16                 | A                   | 2         | 349  |
| 182/03  | 57225      | IMD             | cc22           | 184           | 11          | 5          | 18          | 8           | 11         | 4           | 21         | 18-1            | 3               | F4-1           | 20                  | 3                  | 0                   |                    |                     | 16                  | 16                 | A                   | 2         | 349  |
| 104/04  | 57218      | IMD             | cc22           | 22            | 11          | 5          | 18          | 8           | 11         | 24          | 21         | 18-1            | 3               | F4-1           | 20                  | 3                  | 0                   |                    |                     | 16                  | 16                 | A                   | 2         | 349  |
| 104/11  | 57219      | IMD             | cc22           | 6342          | 11          | 3          | 18          | 8           | 11         | 24          | 21         | 18-1            | 3               | F4-1           | 20                  | 3                  | 0                   |                    |                     | 16                  | 16                 | A                   | 2         | 349  |
| 24/14   | 57834      | CAR             | cc22           | 3172          | 10          | 5          | 18          | 8           | 11         | 24          | 21         | 18-1            | 3               | F4-1           | 20                  | 3                  | 0                   |                    |                     | 16                  | 16                 | A                   | 2         | 349  |
| 25/14   | 57209      | IMD             | cc22           | 10793         | 11          | 5          | 18          | 17          | 11         | 25          | 21         | 5-2             | 10              | F3-4           | 20                  | 3                  | 0                   |                    |                     | 16                  | 16                 | A                   | 2         | 1417 |
| 77/15   | 38989      | IMD             | cc22           | 2878          | 12          | 5          | 18          | 8           | 11         | 24          | 21         | 18-1            | 3               | F4-1           | 20                  | 3                  | 0                   |                    |                     | 16                  | 16                 | A                   | 2         | 349  |
| 71/11   | 57215      | IMD             | cc865          | 3342          | 8           | 5          | 6           | 17          | 8          | 31          | 8          | 5-2             | 10-1            | F5-8           | 89                  | 257                | 21                  | 109                | NadA-4/5            | 321                 | 380                | B                   | 1         | 1320 |
| 67/12   | 57214      | IMD             | cc865          | 3342          | 8           | 5          | 6           | 17          | 8          | 31          | 8          | 5-2             | 10-1            | F5-8           | 89                  | 257                | 21                  | 109                | NadA-4/5            | 321                 | 380                | B                   | 1         | 1320 |
| 77/12   | 57216      | IMD             | cc865          | 3342          | 8           | 5          | 6           | 17          | 8          | 31          | 8          | 5-2             | 10-1            | F5-8           | 89                  | 257                | 0                   |                    |                     | 321                 | 380                | B                   | 1         | 2939 |
| 6/16    | 41191      | IMD             | cc865          | 3342          | 8           | 5          | 6           | 17          | 8          | 31          | 8          | 5-2             | 10-1            | F5-8           | 89                  | 257                | 21                  | 109                | NadA-4/5            | 321                 | 380                | B                   | 1         | 1320 |
| 61/16   | 57212      | IMD             | cc865          | 3342          | 8           | 5          | 6           | 17          | 8          | 31          | 8          | 5-2             | 10-1            | F5-8           | 89                  | 257                | 21                  | 109                | NadA-4/5            | 321                 | 380                | B                   | 1         | 1320 |
| 94/16   | 57217      | IMD             | cc865          | 3342          | 8           | 5          | 6           | 17          | 8          | 31          | 8          | 5-2             | 10-1            | F5-8           | 89                  | 257                | 21                  | 109                | NadA-4/5            | 321                 | 380                | B                   | 1         | 1320 |
| 5/17    | 57829      | IMD             | cc865          | 3342          | 8           | 5          | 6           | 17          | 8          | 31          | 8          | 5-2             | 10-1            | F5-8           | 89                  | 1438               | 21                  | 109                | NadA-4/5            | 321                 | 380                | B                   | 1         | 1320 |
| 11/17   | 57832      | CAR             | cc865          | 3342          | 8           | 5          | 6           | 17          | 8          | 31          | 8          | 5-2             | 10-1            | F5-8           | 89                  | 1438               | 21                  | 109                | NadA-4/5            | 321                 | 380                | B                   | 1         | 1320 |
| 290/94  | 57226      | IMD             | cc11           | 247           | 2           | 3          | 4           | 5           | 8          | 4           | 6          | 5               | 2               | F3-1           | 29                  | 17                 | 3                   | 3                  | NadA-2/3            | 22                  | 22                 | A                   | 2         | 3    |
| 318/95  | 57227      | IMD             | cc11           | 11            | 2           | 3          | 4           | 3           | 8          | 4           | 6          | 5               | 2               | F3-1           | 29                  | 17                 | 3                   | 3                  | NadA-2/3            | 22                  | 22                 | A                   | 2         | 3    |
| 39/96   | 57211      | IMD             | cc11           | 11            | 2           | 3          | 4           | 3           | 8          | 4           | 6          | 5               | 2               | F3-1           | 29                  | 17                 | 3                   | 3                  | NadA-2/3            | 22                  | 22                 | A                   | 2         | 3    |
| 63/16   | 57213      | IMD             | cc11           | 11            | 2           | 3          | 4           | 3           | 8          | 4           | 6          | 5               | 2               | F1-1           | 29                  | 17                 | 6                   | 5                  | NadA-2/3            | 22                  | 22                 | A                   | 2         | 2    |
| 162/98  | 57222      | IMD             | cc174          | 2977          | 6           | 148        | 15          | 17          | 5          | 24          | 17         | 22              | 26              | F3-7           | 6                   | 9                  | 0                   |                    |                     | 13                  | 13                 | B                   | 1         | 2857 |
| 128/00  | 57221      | IMD             | cc174          | 3474          | 6           | 5          | 34          | 17          | 5          | 24          | 9          | 22              | 26              | F3-7           | 6                   | 9                  | 0                   |                    |                     | 321                 | 380                | B                   | 1         | 2865 |
| 172/02  | 57224      | IMD             | cc174          | 2977          | 6           | 148        | 15          | 17          | 5          | 24          | 17         | 22              | 26              | F3-7           | 6                   | 9                  | 0                   |                    |                     | 421                 | 491                | A                   | 2         | 355  |
| 67/01   | 57836      | CAR             | cc41/44        | 5002          | 2           | 5          | 9           | 9           | 9          | 6           | 8          | 19              | 15              | F1-14          | 656                 | 533                | 0                   |                    |                     | 24                  | 24                 | A                   | 2         | 2866 |
| 148/01  | 57844      | CAR             | cc1136         | 13459         | 5           | 210        | 38          | 15          | 22         | 40          | 13         | 18-4            | 25              | F4-1           | 145                 | 44                 | 0                   |                    |                     | 94                  | 91                 | A                   | 3         | 657  |
| 149/01  | 57845      | CAR             | cc53           | 123           | 16          | 2          | 6           | 25          | 17         | 11          | 22         | 7-2             | 10-1            | F1-13          | 58                  | 65                 | 0                   |                    |                     | 102                 | 102                | A                   | 2         | 2871 |
| 86/01   | 57841      | CAR             | ccUA           | 4774          | 23          | 5          | 9           | 68          | 13         | 32          | 8          | 19-1            | 9               | F5-13          | 24                  | 15                 | 0                   |                    |                     | 245                 | 302                | B                   | 1         | 2873 |
| 107/01  | 57220      | IMD             | ccUA           | 1184          | 46          | 20         | 4           | 7           | 58         | 20          | 8          | 5-3             | 2-16            | F1-5           | 129                 | 234                | 0                   |                    |                     | 21                  | 21                 | A                   | 2         | 2872 |
| 170/02  | 57223      | IMD             | ccUA           | 130           | 23          | 5          | 9           | 3           | 13         | 32          | 8          | 18-12           | 10-2            | F2-7           | 24                  | 15                 | 0                   |                    |                     | 245                 | 302                | B                   | 1         | 1298 |

clinical status IMD / CAR = isolate from the invasive meningococcal disease or from a healthy carrier

ccUA = clonal complex unassigned

*porA* VR1, VR2 = *porA* variable region 1 and 2

0 = isolate lacks a functional allele

yellow highlight = newly described gene allele, the sequence type, or the BAST type

226 This allelic form of the *nhba* gene has not yet been known, and its sequence was submitted to  
227 the PubMLST database to be assigned a new allele number. Isolate 77/12 has lost a functional  
228 allele of the *nadA* gene which is present in all other isolates (allele 109, peptide variant 21), as  
229 also reflected by assignment to a different BAST type – 2939, with all other isolates being  
230 classified into BAST 1320. The *fhbp* gene in all isolates is represented by allele 380 (peptide  
231 ID 321, subfamily 1/B). All cc865 ST-3342 isolates from the Czech Republic have the same  
232 finotyping antigens (5-2,10-1:F5-8).

233 Ten out of the 31 study Czech isolates of *N. meningitidis* W belonged to clonal complex cc22.  
234 The higher diversity of the phylogenetic network is reflected in the fact that these 10 isolates  
235 are assigned to seven different sequence types: ST-2878 (n = 4), ST-22, ST-114, ST-184, ST-  
236 3172, ST-6342, and ST-10793 (Tab. 1). In the Czech Republic, cc22 isolates were recovered  
237 in all three study intervals. Isolates 21/84 (ST-114) and 25/14 (ST-10793) are separated from  
238 other isolates and share similar molecular characteristics despite the large time gap between  
239 their detection (1984 vs. 2014). Unlike all other cc22 isolates (18-1,3:F4-1; BAST 349), they  
240 have the same difference in finotyping antigens and BAST type (5-2,10:F3-4; BAST 1417),  
241 and unlike all other isolates with allele 8, they exhibit the same allele change of one MLST  
242 gene, *fumC*, to allele 17. Isolate 104/04 (ST-22) is also partly separated from all other cc22  
243 isolates. Three isolates of ST-2878 (165/02, 114/03, and 124/03) show high relatedness. The  
244 fourth isolate, 77/15, of the same ST (ST-2878) is evolutionarily more distant, probably as a  
245 result of the accumulation of genetic changes due to the large time gap between their  
246 detection. All cc22 isolates show full homogeneity in the MenB vaccine antigen genes.

247 Characteristics of the MenB vaccine antigen genes: *nhba* – allele 3 (peptide variant 20), *fhbp*  
248 – allele 16 (peptide ID 16, subfamily 2/A), and absence of a functional form of *nadA*.

249 Only four study Czech isolates belonged to the hypervirulent clonal complex cc11, which is  
250 not consistent with the recent global upward trend in *N. meningitidis* W cc11 cases. Three of

251 these four cc11 isolates were recovered between 1994 and 1996 and thus do not belong to the  
252 new lineages of *N. meningitidis* W cc11, which are spreading worldwide. Except the fact that  
253 isolate 290/94 was assigned to ST-247 (the other two are of ST-11; the difference in the allele  
254 of the *fumC* gene – ST-11 allele 3 vs. ST-247 allele 5), these isolates share identical molecular  
255 characteristics: finotyping antigens 5,2:F3-1; *nhba* – allele 17 (peptide variant 29), *fhbp* –  
256 allele 22 (peptide ID 22, subfamily 2/A), *nadA* – allele 3 (peptide variant 3), and BAST type –  
257 3 (Tab. 1). The molecular characteristics of isolate 63/16 from 2016 are consistent with those  
258 of the new lineages of *N. meningitidis* W cc11, but this IMD isolate originates from a  
259 Canadian traveller from Hungary to the Czech Republic. Unlike the three previous isolates,  
260 isolate 63/16 shows changes in finotyping antigens (5,2:F1-1) and the *nadA* gene (allele 5,  
261 peptide variant 6), as also reflected in BAST type changed to BAST 2.

262 Three isolates belong to clonal complex cc174. Isolates 162/98 and 172/02 are assigned to  
263 sequence type ST-2977 and isolate 128/00 to ST-3474, as is reflected by their positions in the  
264 phylogenetic network. These sequence types differ in three alleles of the genes *adk*, *aroE*, and  
265 *pgm* (MLST). All these isolates recovered between 1998 and 2002 share identical molecular  
266 characteristics in terms of finotyping antigens (22,26:F3-7), the *nhba* gene (allele 9, peptide  
267 variant 6), and absence of a functional allele of the *nadA* gene. Each isolate has a unique allele  
268 of the *fhbp* gene and unique BAST (Tab. 1).

269 Three clonal complexes, each represented by one isolate, i.e. 67/01 (cc41/44, ST-5002),  
270 149/01 (cc53, ST-123), and 148/01 (cc1136, ST-13459), are clearly delineated from other  
271 clonal complexes and evolutionarily distant from each other. Isolate 148/01 showed as yet  
272 undescribed MLST gene allele combination. Using the PubMLST database, this combination  
273 was assigned a new sequence type ST-13459.

274 Three isolates unassigned to clonal complex by the PubMLST database are 170/02 (ST-130),  
275 107/01 (ST-1184), and 86/01 (ST-4774). While isolate 107/01 is clearly separated in the

276 phylogenetic network, isolates 86/01 and 170/02 show a relatively high level of relatedness.  
277 Although having different finotyping antigens (ST-130 finotyping 18-12,10-2:F2-7 vs. ST-  
278 4774 finotyping 19-1,9:F5-13), these two isolates only vary in a single MLST gene allele  
279 (gene *fumC* – ST-130 allele 3 vs. ST-4774 allele 68). Nevertheless, they are fully congruent in  
280 MenB vaccine antigen genes: *nhba* – allele 15 (peptide variant 24), *fhbp* – allele 302 (peptide  
281 ID 245, subfamily 1/B), and absence of a functional form of *nadA* (Tab. 1).

### 282 **Genetic diversity of *N. meningitidis* W cc11 isolates**

283 The complex phylogenetic network of worldwide cc11 isolates (Fig. 3) clearly shows that  
284 Czech isolates 290/94, 318/95, and 39/96 do not belong to the new *N. meningitidis* W cc11  
285 lineages that now cause IMD worldwide. These three isolates belong to genetically distant  
286 lineages grouping mostly isolates recovered before the year 2000. It was also confirmed that  
287 the imported isolate 63/16, on the contrary, belongs to these modern hypervirulent lineages. It  
288 forms a large cluster along with many isolates recovered almost exclusively after 2010. This  
289 cluster is clearly divided into several subpopulations, which is in line with studies from other  
290 European countries. The information presented thus confirms that the recent increase in IMD  
291 caused by new hypervirulent serogroup W cc11 lineages, as observed in other European and  
292 non-European countries, still did not reach the Czech Republic.

### 293 **Genetic diversity of *N. meningitidis* W cc22 isolates**

294 A relatively even distribution of Czech isolates can be seen in the phylogenetic network of  
295 clonal complex cc22 (Fig. 4), which is consistent with the high variability of sequence types  
296 within this complex. An exception is a cluster of four isolates of ST-2878 (165/02, 114/03,  
297 124/03, and 77/15), as is expected given their assignment to the same sequence type. Isolate  
298 24/14 (ST-3172) also appears to be closely related to ST-2878 isolates. As can be seen from  
299 the molecular characteristics (Tab. 1), the only difference between these sequence types is in  
300 the allele of the *abcZ* gene (ST-2878 – allele 12 vs. ST-3172 – allele 10). This was also

301 confirmed by the described genetic relatedness of isolates 21/84 and 25/14. It appears that in  
302 European countries other than the Czech Republic, cc22 is less common than cc11. The  
303 proportion of cc22 among isolates from the Czech Republic (32 %) is uncommonly high in  
304 comparison with other European countries.

### 305 **Genetic relationships between *N. meningitidis* W isolates from Czech Republic and** 306 **United Kingdom**

307 The phylogenetic network, which represents the genetic diversity of isolates from the Czech  
308 Republic and United Kingdom (Fig. 5), shows that most serogroup W isolates belong to two  
309 clonal complexes, cc11 and cc22. The cc11 isolates are clearly more numerous than the cc22  
310 isolates. In the phylogenetic network, these two groups are clearly distinct from each other  
311 and genetically distant from each other. The phylogenetic network of clonal complex cc11  
312 displays several subpopulations of new W cc11 lineages, one genetically distinct  
313 subpopulation of isolates recovered mainly in 2000 – 2009, and several historical lineages  
314 from 1975 – 1999. As few as 30 (3 %) isolates from this selection were assigned to other  
315 clonal complexes. In this population of other clonal complexes where isolates from the Czech  
316 Republic account for more than half, it can be seen a rather heterogeneous cc174 lineage  
317 comprising both Czech and UK isolates and eight cc865 isolates originating exclusively from  
318 the Czech Republic. Clonal complex cc11 comprises one isolate, 63/16, from an imported  
319 case of IMD, which belongs among new W cc11 lineages, and three Czech isolates (290/94,  
320 318/95 a 39/96) recovered before the year 2000 and belonging to clearly separated and  
321 genetically distinct historical lineages. In conclusion, it can be stated that serogroup W clonal  
322 complexes from the Czech Republic and the UK differ in the population structure. In the UK,  
323 the cc11 lineages are predominant while cc22 isolates are rather rare and isolates belonging to  
324 other clonal complexes are found only sporadically. On the other hand, the clonal complex

325 most often detected in the Czech Republic is cc22 (32 %), and isolates from other clonal  
326 complexes (almost 55 %) are also common.

### 327 **Genetic relationships between *N. meningitidis* W isolates from Czech Republic and** 328 **continental Europe**

329 The following phylogenetic network (Fig. 6) illustrative of the genetic variability of  
330 serogroup W isolates from the Czech Republic and other European countries shows more  
331 heterogeneity than the previous figure. Again, most isolates belong to clonal complexes cc11  
332 and cc22, but unlike cc22 isolates, cc11 isolates experienced a considerable decline. It is  
333 evident that cc22 is more commonly detected in European countries than in the UK.

334 Nevertheless, cc11 isolates are still more frequent than cc22 isolates. The proportion of  
335 isolates assigned to other clonal complexes is also higher. In the phylogenetic network, there  
336 can be seen a lineage of four ccUA isolates from the Netherlands from 2011 – 2016 showing  
337 partial relatedness to cc22 and a distinct lineage of two cc8 isolates from France from 1978.

338 In a large heterogeneous group of isolates belonging to clonal complexes other than cc11 and  
339 cc22, a separate cc174 lineage appears again, comprising isolates from the Czech Republic  
340 and other European countries. Clonal complex cc865, so far only represented by isolates from  
341 the Czech Republic, was extended by one isolate (cc865, ST-12256) from the Netherlands  
342 from 2017. It is interesting to note that six isolates of sequence type ST-9316 unassigned to  
343 clonal complex from France (n = 5) and Ireland (n = 1) from 2015 – 2016 show a higher  
344 relatedness to the Czech cluster of cc865 (ST-3342) isolates than the Dutch isolate belonging  
345 to the same clonal complex.

### 346 **Genetic relationships between *N. meningitidis* W isolates from Czech Republic and non-** 347 **European countries**

348 Similarly to the previous two figures (Fig. 5 and Fig. 6), two main clusters of cc11 and cc22  
349 isolates can be seen in this figure (Fig 7). Both clusters, and cc11 in particular, show higher

350 heterogeneity, which is probably due to the geographical diversity of the isolates. In clonal  
351 complex cc11, there are more isolates recovered before 2010 in comparison with two groups  
352 of isolates from European countries and the UK, where the two modern lineages were  
353 predominant (particularly among the European isolates). The proportion of cc22 isolates  
354 declined in comparison with the European isolates while the number of isolates belonging to  
355 other clonal complexes remained nearly unchanged, with many isolates originating from the  
356 Czech Republic again. This group comprises cc174 isolates from both the Czech Republic  
357 and non-European countries. An additional clonal complex cc175 can be seen, including nine  
358 highly related isolates from African countries (three from Niger, ST-2881; two from Benin,  
359 ST-2881; two from Togo, ST-2881, and two from Burkina Faso, ST-2881 and ST-8638) from  
360 2003 – 2010 and one genetically more distant isolate (ST-6218) from the Republic of South  
361 Africa from 2003. Clonal complex cc865, comprising eight isolates from the Czech Republic  
362 (ST-3342), was added with one South African isolate (cc865, ST-8608) from 2009.  
363 Interesting to note are nine highly related cc4821 ST-8491 isolates from China. According to  
364 the data available from the PubMLST database, no serogroup W isolate belonging to cc4821  
365 has not yet been reported by any other country, so, this clonal complex of serogroup W is  
366 endemic in China [27].

## 367 **Discussion**

368 In countries of Sub-Saharan Africa, Middle East, and Western Europe or in Australia, cc11 is  
369 the serogroup W clonal complex which is on the rise. Recently, *N. meningitidis* W cc11 has  
370 even become the main cause of IMD in the UK, France, the Netherlands, and Sweden. At  
371 present, most cases of IMD in the UK, the Netherlands, Sweden, and France are caused by the  
372 lineages called the original UK strain and 2013-UK strain of hypervirulent *N. meningitidis* W  
373 cc11 [8, 9, 10, 28, 29]. Our WGS study shows that the Czech isolates of *N. meningitidis* W do  
374 not belong to these novel hypervirulent cc11 lineages. The potential for a rapid spread of



375 hypervirulent *N. meningitidis* W cc11 in the world was demonstrated in connection with the  
376 World Scout Jamboree held in Japan in 2015, with cases of IMD caused by *N. meningitidis* W  
377 cc11 reported in jamboree participants and their close contacts (four cases in Scotland and  
378 two cases in Sweden) [30]. Given the increased international travel, surveillance of this  
379 hypervirulent complex in the Czech Republic is of high relevance. Using the WGS method,  
380 one IMD isolate of *N. meningitidis* W was confirmed to belong to the novel hypervirulent  
381 lineage cc11. This isolate originated from an imported case of IMD in a traveller of Canadian  
382 nationality who came to the Czech Republic from Hungary in 2016.

383 The most interesting finding of this study is that eight of 31 Czech isolates of *N. meningitidis*  
384 W belong to clonal complex cc865, which is uncommon for serogroup W as can be inferred  
385 from the data available in the PubMLST database. All Czech cc865 isolates are genetically  
386 highly homogeneous, were isolated exclusively between 2010 and 2017, and belong to the  
387 same sequence type, ST-3342, which, to date, has only been reported from the Czech  
388 Republic (PubMLST). This body of evidence supports the assumption that isolates cc865, ST-  
389 3342 originate from a common ancestor that evolved in the Czech Republic.

390 The WGS has a higher resolution in comparison with conventional sequencing methods and  
391 demonstrated the genetic heterogeneity of the population of *N. meningitidis* W cc11. The Hajj  
392 lineage continued to spread in the Middle East while in South African and meningitis belt  
393 countries, other strains of *N. meningitidis* W were recovered along with it. South America, the  
394 UK, and France share another genetically different strain of *N. meningitidis* W cc11 [31]. The  
395 WGS method demonstrated the diversification of *N. meningitidis* W in the African meningitis  
396 belt during the period 1994 – 2012 [32]. The study isolates belonged to cc11 (83 out of 92) or  
397 cc175 (nine out of 93). *N. meningitidis* W cc11 isolates were classified into four major  
398 subclades, I – IV, linked to specific epidemiological situations: subclades I and II were not

399 linked to outbreaks, subclade II was linked to the 2002 outbreak in Burkina Faso, and  
400 subclade IV was linked to the 2000 outbreak in Saudi Arabia.

401 The WGS was introduced into molecular surveillance of IMD in the Czech Republic [33] in  
402 line with the ECDC strategy [34]. Our paper is the first presentation of the results of the WGS  
403 study of *N. meningitidis* W isolates from the collection of the Czech NRL spanning a 33-year  
404 period. The first clonal study of the historical collection of isolates of all serogroups  
405 recovered from cases of IMD in the Czech Republic over a more than 40-year period was  
406 based on the analysis of MLST results [35].

407 In response to the rise in IMD caused by hypervirulent lineages of *N. meningitidis* W cc11,  
408 immunisation campaigns using tetravalent meningococcal conjugate ACYW vaccine were  
409 launched in some countries, for example in Chile and the UK [3, 36]. In view of the low  
410 incidence of IMD and absence of hypervirulent lineages of *N. meningitidis* W cc11 in the  
411 Czech Republic, no vaccination campaign is considered in this country, and individual  
412 protection is recommended [37]. Further molecular surveillance of IMD is needed to assess  
413 the outcomes of the recommended vaccination strategy in the Czech Republic.

414 The UK study pointed out the potential of the MenB-4C vaccine against hypervirulent *N.*  
415 *meningitidis* W cc11 [38, 39]. Despite being licensed for the prevention of IMD caused by  
416 serogroup B, the MenB-4C vaccine contains antigens which are not serogroup B specific and  
417 can provide protection against other capsular serogroups, which share the same antigens.

418 MenB vaccine is expected to elicit bactericidal antibodies against *N. meningitidis* W cc11 in  
419 children (infants and toddlers). The WGS detection of MenB vaccine genes in Czech *N.*  
420 *meningitidis* W isolates suggests the potential of this vaccine also against serogroup W  
421 isolates.

## 422 **Acknowledgment**

423 Supported by the Ministry of Health of the Czech Republic, grant no. 15-34887A. All rights  
424 reserved. This publication made use of the PubMLST website (<https://pubmlst.org/>)  
425 developed by Keith Jolley (Jolley & Maiden 2010, BMC Bioinformatics, 11:595) and sited at  
426 the University of Oxford. The development of that website was funded by the Wellcome  
427 Trust.

## 428 **References**

- 429 1. Taha MK, Achtman M, Alonso JM, Greenwood B, Ramsay M, Fox A, *et al.* Serogroup  
430 W135 meningococcal disease in Hajj pilgrims. *Lancet*. 2000; 356(9248):2159. DOI:  
431 10.1016/S0140-6736(00)03502-9 PMID: 11191548
- 432 2. Mayer LW, Reeves MW, Al-Hamdan N, Sacchi CT, Taha MK, Ajello GW, *et al.*  
433 Outbreak of W135 Meningococcal Disease in 2000: Not Emergence of a New W135  
434 Strain but Clonal Expansion within the Electrophoretic Type-37 Complex. *J Infect Dis*.  
435 2002; 185(11):1596-605. DOI: 10.1086/340414 PMID: 12023765
- 436 3. Abad R, López EL, Debbag R, Vázquez JA. Serogroup W meningococcal disease: global  
437 spread and current affect on the Southern Cone in Latin America. *Epidemiol Infect*. 2014;  
438 142(12):2461-70. DOI: 10.1017/S0950268814001149 PMID: 24831052
- 439 4. Abad R, Vázquez JA. Early evidence of expanding W ST-11 CC meningococcal  
440 incidence in Spain. *J Infect*. 2016; 73(3):296-7. DOI: 10.1016/j.jinf.2016.06.010 PMID:  
441 27387450
- 442 5. Aguilera JF, Perrocheau A, Meffre C, Hahné S, W135 Working Group. Outbreak of  
443 Serogroup W135 Meningococcal Disease after the Hajj Pilgrimage, Europe, 2000. *Emerg*  
444 *Infect Dis*. 2002; 8(8):761-7. DOI: 10.3201/eid0805.010422 PMID: 12141959
- 445 6. Bassi C, Taha MK, Merle C, Hong E, Lévy-Bruhl D, Barret AS, *et al.* A cluster of  
446 invasive meningococcal disease (IMD) caused by *Neisseria meningitidis* serogroup W

- 447 among university students, France, February to May 2017. *Euro Surveill.* 2017;  
448 22(28):pii30574. DOI: 10.2807/1560-7917.ES.2017.22.28.30574 PMID: 28749333
- 449 7. Ladhani SN, Beebeejaun K, Lucidarme J, Campbell H, Gray SJ, Kaczmarek E, *et al.*  
450 Increase in Endemic *Neisseria meningitidis* Capsular Group W Sequence Type 11  
451 Complex Associated With Severe Invasive Disease in England and Wales. *Clin Infect Dis.*  
452 2015; 60(4):578-85. DOI: 10.1093/cid/ciu881 PMID: 25389259
- 453 8. Lucidarme J, Hill DM, Bratcher HB, Gray SJ, du Plessis M, Tsang RS, *et al.* Genomic  
454 resolution of an aggressive, widespread, diverse and expanding meningococcal serogroup  
455 B, C and W lineage. *J Infect.* 2015; 71(5):544-52. DOI: 10.1016/j.jinf.2015.07.007 PMID:  
456 26226598
- 457 9. Lucidarme J, Scott KJ, Ure R, Smith A, Lindsay D, Stenmark B, *et al.* An international  
458 invasive meningococcal disease outbreak due to a novel and rapidly expanding serogroup  
459 W strain, Scotland and Sweden, July to August 2015. *Euro Surveill.* 2016;  
460 21(45):pii30395. DOI: 10.2807/1560-7917.ES.2016.21.45.30395 PMID: 27918265
- 461 10. Hong E, Barret AS, Terrade A, Denizon M, Antona D, Aouiti-Trabelsi M, *et al.* Clonal  
462 replacement and expansion among invasive meningococcal isolates of serogroup W in  
463 France. *J Infect.* 2018; 76(2):149-58. DOI: 10.1016/j.jinf.2017.10.015 PMID: 29132919
- 464 11. Rasoanandrasana S, Raberahona M, Milenkov M, Rakotomahefa Narison ML, Ranaivo  
465 Rabetokotany F, Rakotovo L, *et al.* Resurgence of *Neisseria meningitidis* serogroup W  
466 ST-11 (cc11) in Madagascar, 2015-2016. *Int J Infect Dis.* 2017; 55:1-3. DOI:  
467 10.1016/j.ijid.2016.12.001 PMID: 27940178
- 468 12. Martin NV, Ong KS, Howden BP, Lahra MM, Lambert SB, Beard FH, *et al.* Rise in  
469 invasive serogroup W meningococcal disease in Australia, 2013-2015. *Commun Dis Intell*  
470 *Q Rep.* 2016; 40(4):E454-E459. PMID: 28043219

- 471 13. Veitch MG, Owen RL. Rise in invasive serogroup W meningococcal disease in Australia  
472 2013-2015. *Commun Dis Intell Q Rep*. 2016; 40(4):E451-E453. PMID: 28043218
- 473 14. Zerbino DR. Using the Velvet *de novo* assembler for short-read sequencing technologies.  
474 *Curr Protoc Bioinformatics*. 2010; 11(5):1-12. DOI: 10.1002/0471250953.bi1105s31  
475 PMID: 20836074
- 476 15. Jolley KA, Chan MS, Maiden MC. MlstdbNet – distributed multi-locus sequence typing  
477 (MLST) databases. *BMC Bioinformatics*. 2004; 5:86. DOI: 10.1186/1471-2105-5-86  
478 PMID: 15230973
- 479 16. Jolley KA, Maiden MC. BIGSdb: Scalable analysis of bacterial genome variation at the  
480 population level. *BMC Bioinformatics*. 2010; 11:595. DOI: 10.1186/1471-2105-11-595  
481 PMID: 21143983
- 482 17. Maiden MC, Bygraves JA, Feil E, Morelli G, Russell JE, Urwin R, *et al*. Multilocus  
483 sequence typing: a portable approach to the identification of clones within populations of  
484 pathogenic microorganisms. *Proc Natl Acad Sci U S A*. 1998; 95(6):3140-5. PMID:  
485 9501229
- 486 18. Jolley KA, Brehony C, Maiden MC. Molecular typing of meningococci:  
487 recommendations for target choice and nomenclature. *FEMS Microbiol Rev*. 2007;  
488 31(1):89-96. DOI: 10.1111/j.1574-6976.2006.00057.x
- 489 19. Nissen MD, Marshall HS, Richmond PC, Jiang Q, Harris SL, Jones TR, *et al*. A  
490 randomized, controlled, phase ½ trial of a *Neisseria meningitidis* serogroup B bivalent  
491 rLP2086 vaccine in a healthy children and adolescents. *Pediatr Infect Dis J*. 2013;  
492 32(4):364-71. DOI: 10.1097/INF.0b013e31827b0d24 PMID: 23114369
- 493 20. Vernikos G, Medini D. Bexsero® chronicle. *Pathog Glob Health*. 2014; 108(7):305-16.  
494 DOI: 10.1179/2047773214Y.0000000162 PMID: 25417906

- 495 21. Bambini S, De Chiara M, Muzzi A, Mora M, Lucidarme J, Brehony C, *et al.* *Neisseria*  
496 adhesin A variation and revised nomenclature scheme. *Clin Vaccine Immunol.* 2014;  
497 21(7):966-71. DOI: 10.1128/CVI.00825-13 PMID: 24807056
- 498 22. Masignani V, Comanducci M, Giuliani MM, Bambini S, Adu-Bobie J, Arico B, *et al.*  
499 Vaccination against *Neisseria meningitidis* using three variants of the lipoprotein  
500 GNA1870. *J Exp Med.* 2003; 197(6):789-99. DOI: 10.1084/jem.20021911 PMID:  
501 12642606
- 502 23. Serruto D, Spadafina T, Ciucchi L, Lewis LA, Ram S, Tontini M, *et al.* *Neisseria*  
503 *meningitidis* GNA2132, a heparin-binding protein that induces protective immunity in  
504 humans. *Proc Natl Acad Sci U S A.* 2010; 107(8):3770-5. DOI: 10.1073/pnas.0915162107  
505 PMID: 20133713
- 506 24. Brehony C, Rodrigues CMC, Borrow R, Smith A, Cunney R, Moxon ER, *et al.*  
507 Distribution of Bexsero® Antigen Sequence Types (BASTs) in invasive meningococcal  
508 disease isolates: Implications for immunisation. *Vaccine.* 2016; 34(39):4690-7. DOI:  
509 10.1016/j.vaccine.2016.08.015 PMID: 27521232
- 510 25. Bratcher HB, Corton C, Jolley KA, Parkhill J, Maiden MC. A gene-by-gene population  
511 genomics platform: de novo assembly, annotation and genealogical analysis of 108  
512 representative *Neisseria meningitidis* genomes. *BMC Genomics.* 2014; 15(1):1138. DOI:  
513 10.1186/1471-15-1138 PMID: 25523208
- 514 26. Huson DH. SplitsTree: analyzing and visualizing evolutionary data. *Bioinformatics.* 1998;  
515 14(1):68-73. DOI: 10.1093/bioinformatics/14.1.68
- 516 27. He B, Jia Z, Zhou H, Wang Y, Jiang X, Ma H, *et al.* CC4821 serogroup W meningococcal  
517 disease in China. *Int J Infect Dis.* 2014; 29:113-4. DOI: 10.1016/j.ijid.2014.08.022 PMID:  
518 25461240

- 519 28. Knol MJ, Hahné SJM, Lucidarme J, Campbell H, de Melker HE, Gray SJ, *et al.* Temporal  
520 associations between national outbreaks of meningococcal serogroup W and C disease in  
521 the Netherlands and England: an observational cohort study. *Lancet Public Health.* 2017;  
522 2(10):e473-e482. DOI: 10.1016/S2468-2667(17)30157-3 PMID: 29253430
- 523 29. Eriksson L, Hedberg ST, Jacobsson S, Fredlund H, Mölling P, Stenmark B. Whole  
524 genome sequencing of emerging invasive *Neisseria meningitidis* serogroup W in Sweden.  
525 *J Clin Microbiol.* 2018; 56(4):e01409-17. DOI: 10.1128/JCM.01409-17 PMID: 29321195
- 526 30. Smith-Palmer A, Oates K, Webster D, Taylor S, Scott KJ, Smith G, *et al.* Outbreak of  
527 *Neisseria meningitidis* capsular group W among scouts returning from the World Scout  
528 Jamboree, Japan, 2015. *Euro Surveill.* 2016; 21(45):30392. DOI: 10.2807/1560-  
529 7917.ES.2016.21.45.30392 PMID: 27918267
- 530 31. Mustapha MM, Marsh JW, Harrison LH. Global epidemiology of capsular group W  
531 meningococcal disease (1970-2015): Multifocal emergence and persistence of  
532 hypervirulent sequence type (ST)-11 clonal complex. *Vaccine.* 2016; 34(13):1515-23.  
533 DOI: 10.1016/j.vaccine.2016.02.014 PMID: 26876439
- 534 32. Retchless AC, Hu F, Ouédraogo AS, Diarra S, Knipe K, Sheth M, *et al.* The  
535 Establishment and Diversification of Epidemic-Associated Serogroup W Meningococcus  
536 in the African Meningitis Belt, 1994 to 2012. *mSphere.* 2016; 1(6):e00201-16. DOI:  
537 10.1128/mSphere.00201-16 PMID: 27904879
- 538 33. Krizova P, Honskus M, Okonji Z, Musilek M, Kozakova J. Surveillance of invasive  
539 meningococcal disease based on whole genome sequencing (WGS), Czech Republic,  
540 2015. *Epidemiol Mikrobiol Imunol.* 2018; 67(2):64-73.
- 541 34. Revez J, Espinosa L, Albiger B, Leitmeyer KC, Struelens MJ, ECDC National  
542 Microbiology Focal Points and Experts Group. Survey on the Use of Whole-Genome  
543 Sequencing for Infectious Diseases Surveillance: Rapid Expansion of European National

- 544 Capacities, 2015-2016. *Front Public Health*. 2017; 5:374. DOI:  
545 10.3389/fpubh.2017.00347 PMID: 29326921
- 546 35. Jandova Z, Musilek M, Vackova Z, Kozakova J, Krizova P. Serogroup and Clonal  
547 Characterization of Czech Invasive *Neisseria meningitidis* Strains Isolated from 1971 to  
548 2015. *PLoS One*. 2016; 11(12):e0167762. DOI: 10.1371/journal.pone.0167762 PMID:  
549 27936105
- 550 36. Campbell H, Saliba V, Borrow R, Ramsay M, Ladhani SN. Targeted vaccination of  
551 teenagers following continued rapid endemic expansion of a single meningococcal group  
552 W clone (sequence type 11 clonal complex), United Kingdom 2015. *Euro Surveill*. 2015;  
553 20(28):pii21188. DOI: 10.2807/1560-7317.ES2015.20.28.21188 PMID: 26212140
- 554 37. The National Institute of Public Health, Czech Republic. Recommendations of the Czech  
555 Vaccinology Society of the J. E. Purkyně Czech Medical Association for vaccination  
556 against invasive meningococcal disease, 15th January 2018. Accessed 5 March 2018.  
557 Available:[http://www.szu.cz/uploads/IMO/2018\\_Recommendation\\_for\\_vaccination\\_agai](http://www.szu.cz/uploads/IMO/2018_Recommendation_for_vaccination_agai)  
558 [nts\\_IMD.pdf](http://www.szu.cz/uploads/IMO/2018_Recommendation_for_vaccination_agai)
- 559 38. Ladhani SN, Giuliani MM, Biolchi A, Pizza M, Beebeejaun K, Lucidarme J, *et al*.  
560 Effectiveness of Meningococcal B Vaccine against Endemic Hypervirulent *Neisseria*  
561 *meningitidis* W Strain, England. *Emerg Infect Dis*. 2016; 22(2):309-11. DOI:  
562 10.3201/eid2202.150369 PMID: 26811872
- 563 39. Parikh SR, Campbell H, Beebeejaun K, Ribeiro S, Gray SJ, Borrow R, *et al*.  
564 Meningococcal Group W Disease in Infants and Potential Prevention by Vaccination.  
565 *Emerg Infect Dis*. 2016; 22(8):1505-7. DOI: 10.3201/eid2208.160128



Figure 1: **Distribution of *N. meningitidis* serogroup W isolates from Czech Republic in three time periods and assignment to clonal complexes. Isolates were recovered from 1984 to 2017. Part A: all isolates (n = 31), part B: only isolates from invasive meningococcal disease (n = 22).**

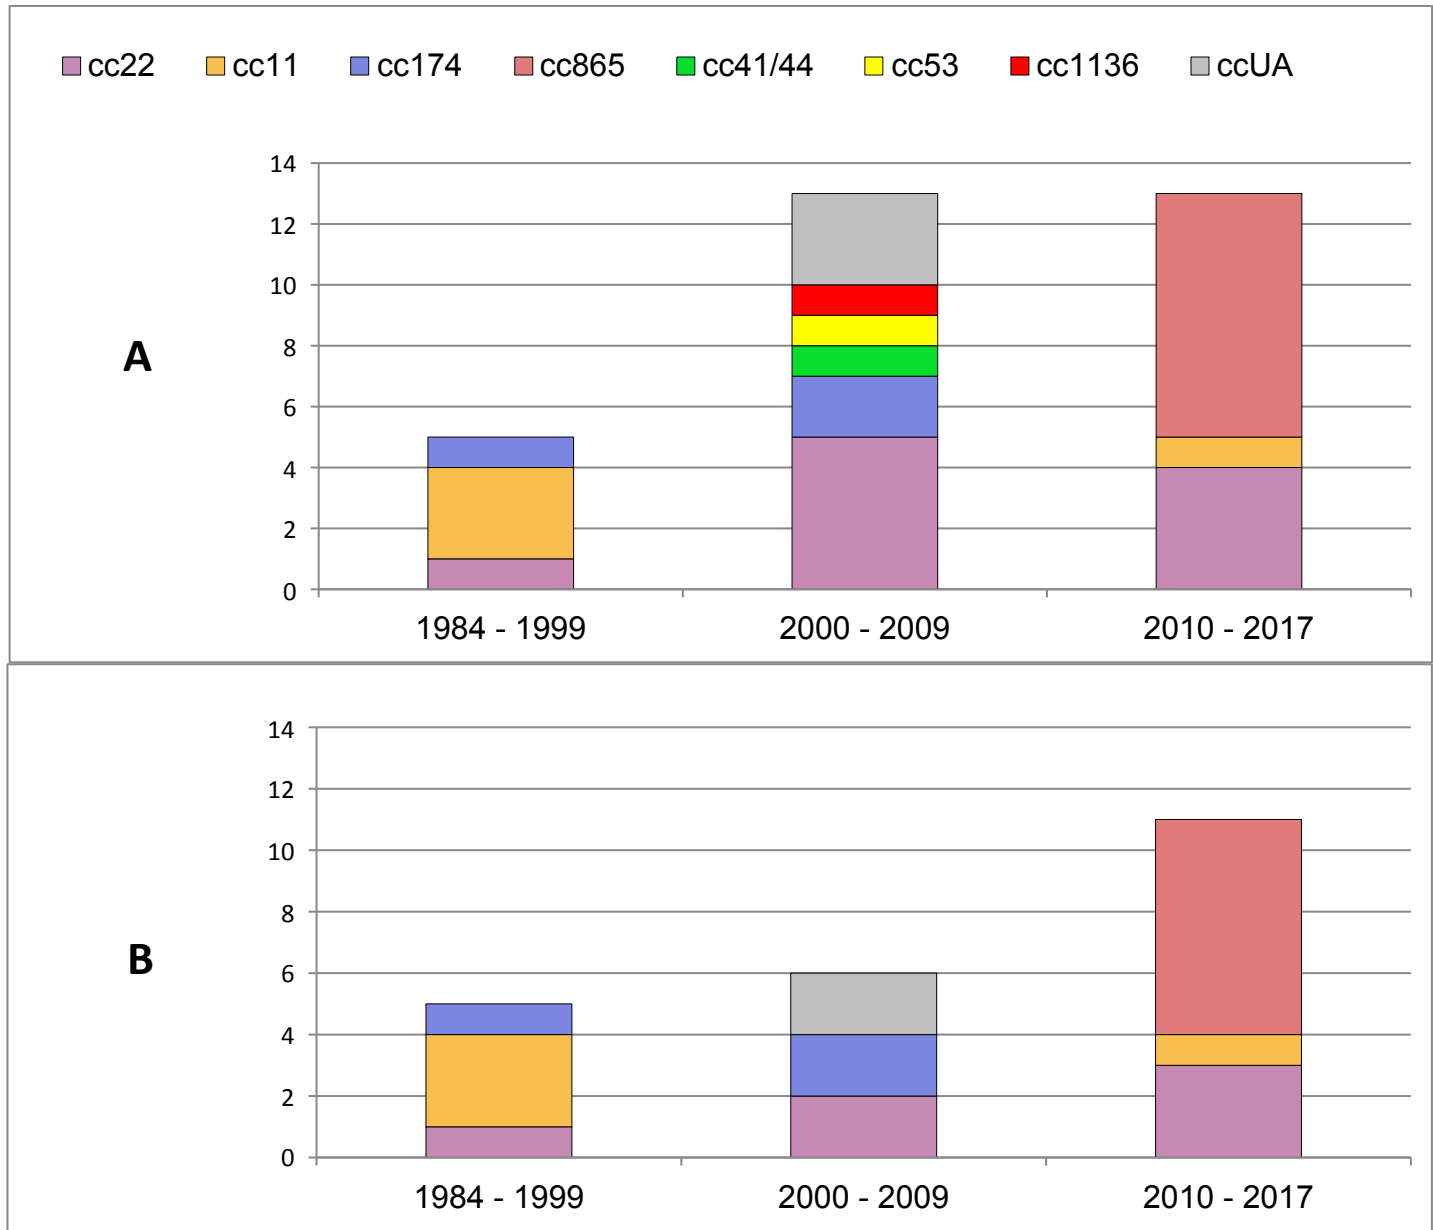

ccUA = clonal complex unassigned

Years

|             |   |   |   |   |   |   |   |   |
|-------------|---|---|---|---|---|---|---|---|
| 1984 - 1999 | 1 | 3 | 1 |   |   |   |   |   |
| 2000 - 2009 | 5 |   | 2 |   | 1 | 1 | 1 | 3 |
| 2010 - 2017 | 4 | 1 |   | 8 |   |   |   |   |

Years

|             |   |   |   |   |   |  |  |  |
|-------------|---|---|---|---|---|--|--|--|
| 1984 - 1999 | 1 | 3 | 1 |   |   |  |  |  |
| 2000 - 2009 | 2 |   | 2 |   | 2 |  |  |  |
| 2010 - 2017 | 3 | 1 |   | 7 |   |  |  |  |

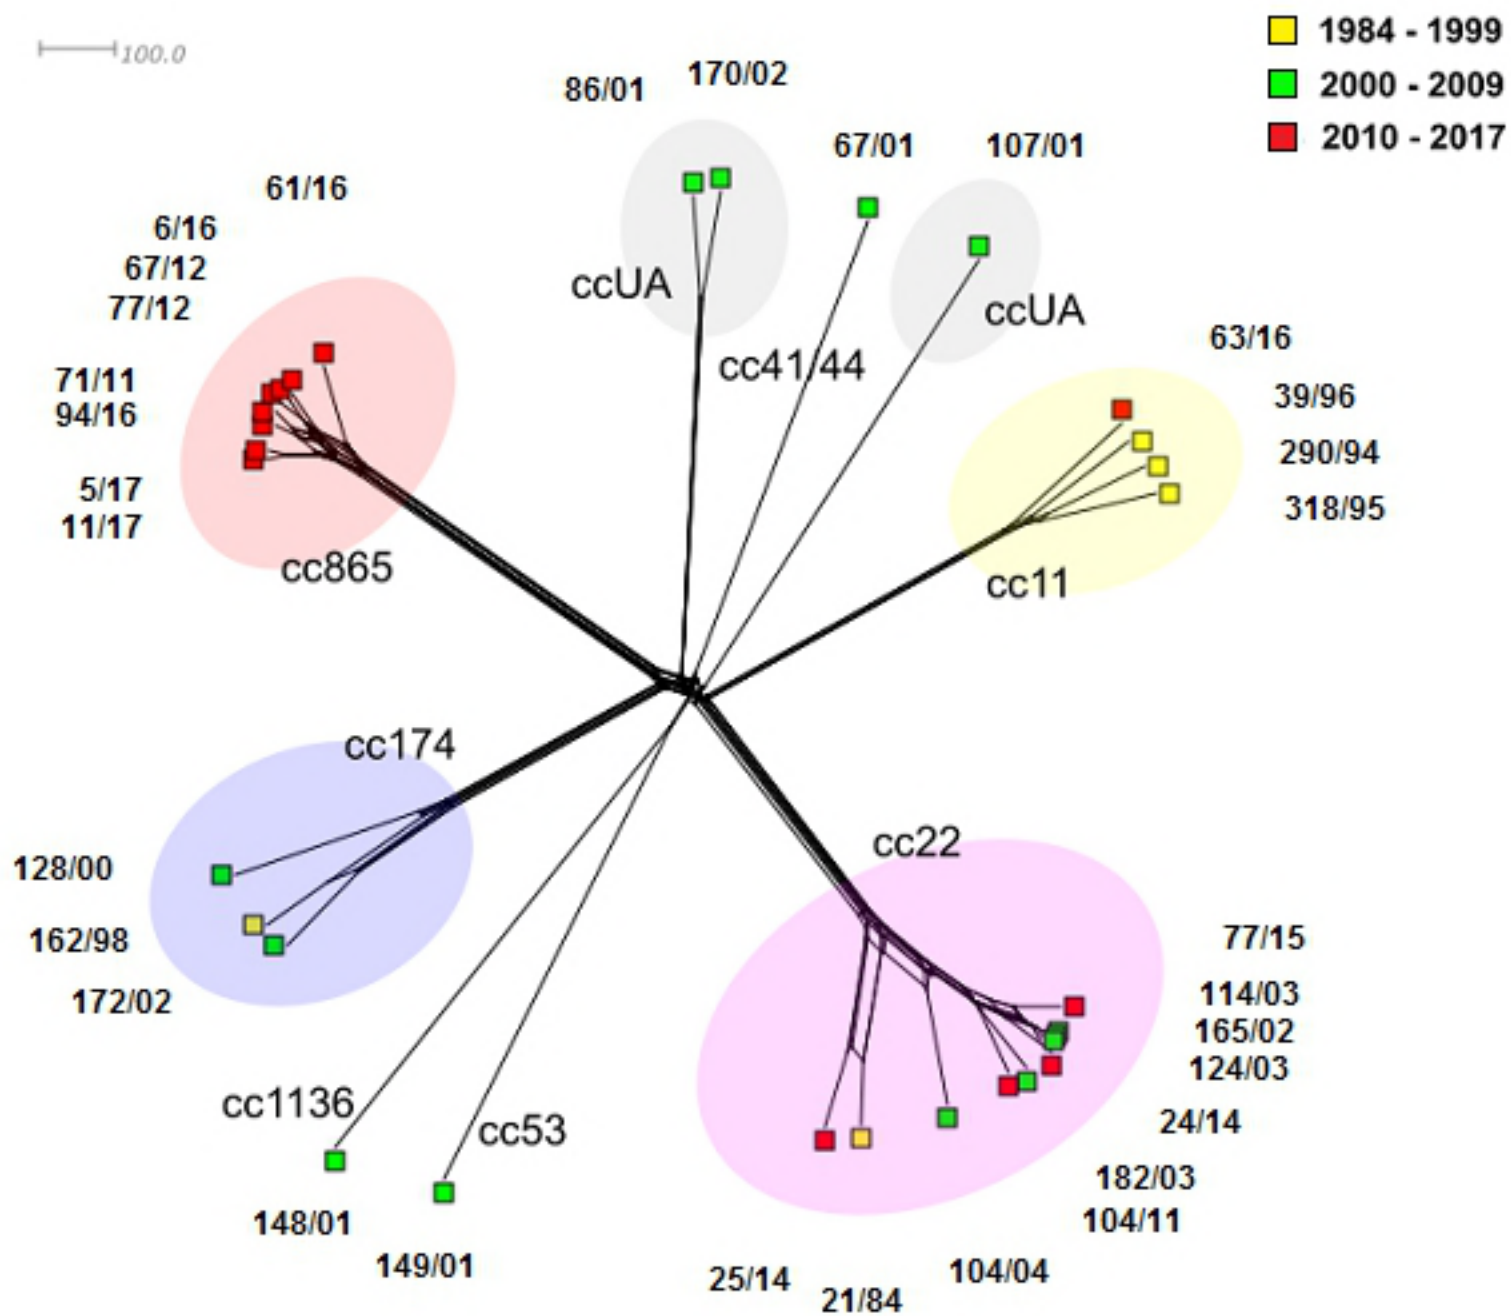

10.0

- 1976 - 1999
- 2000 - 2009
- 2010 - 2017
- not specified

63/16

290/94

39/96

318/95

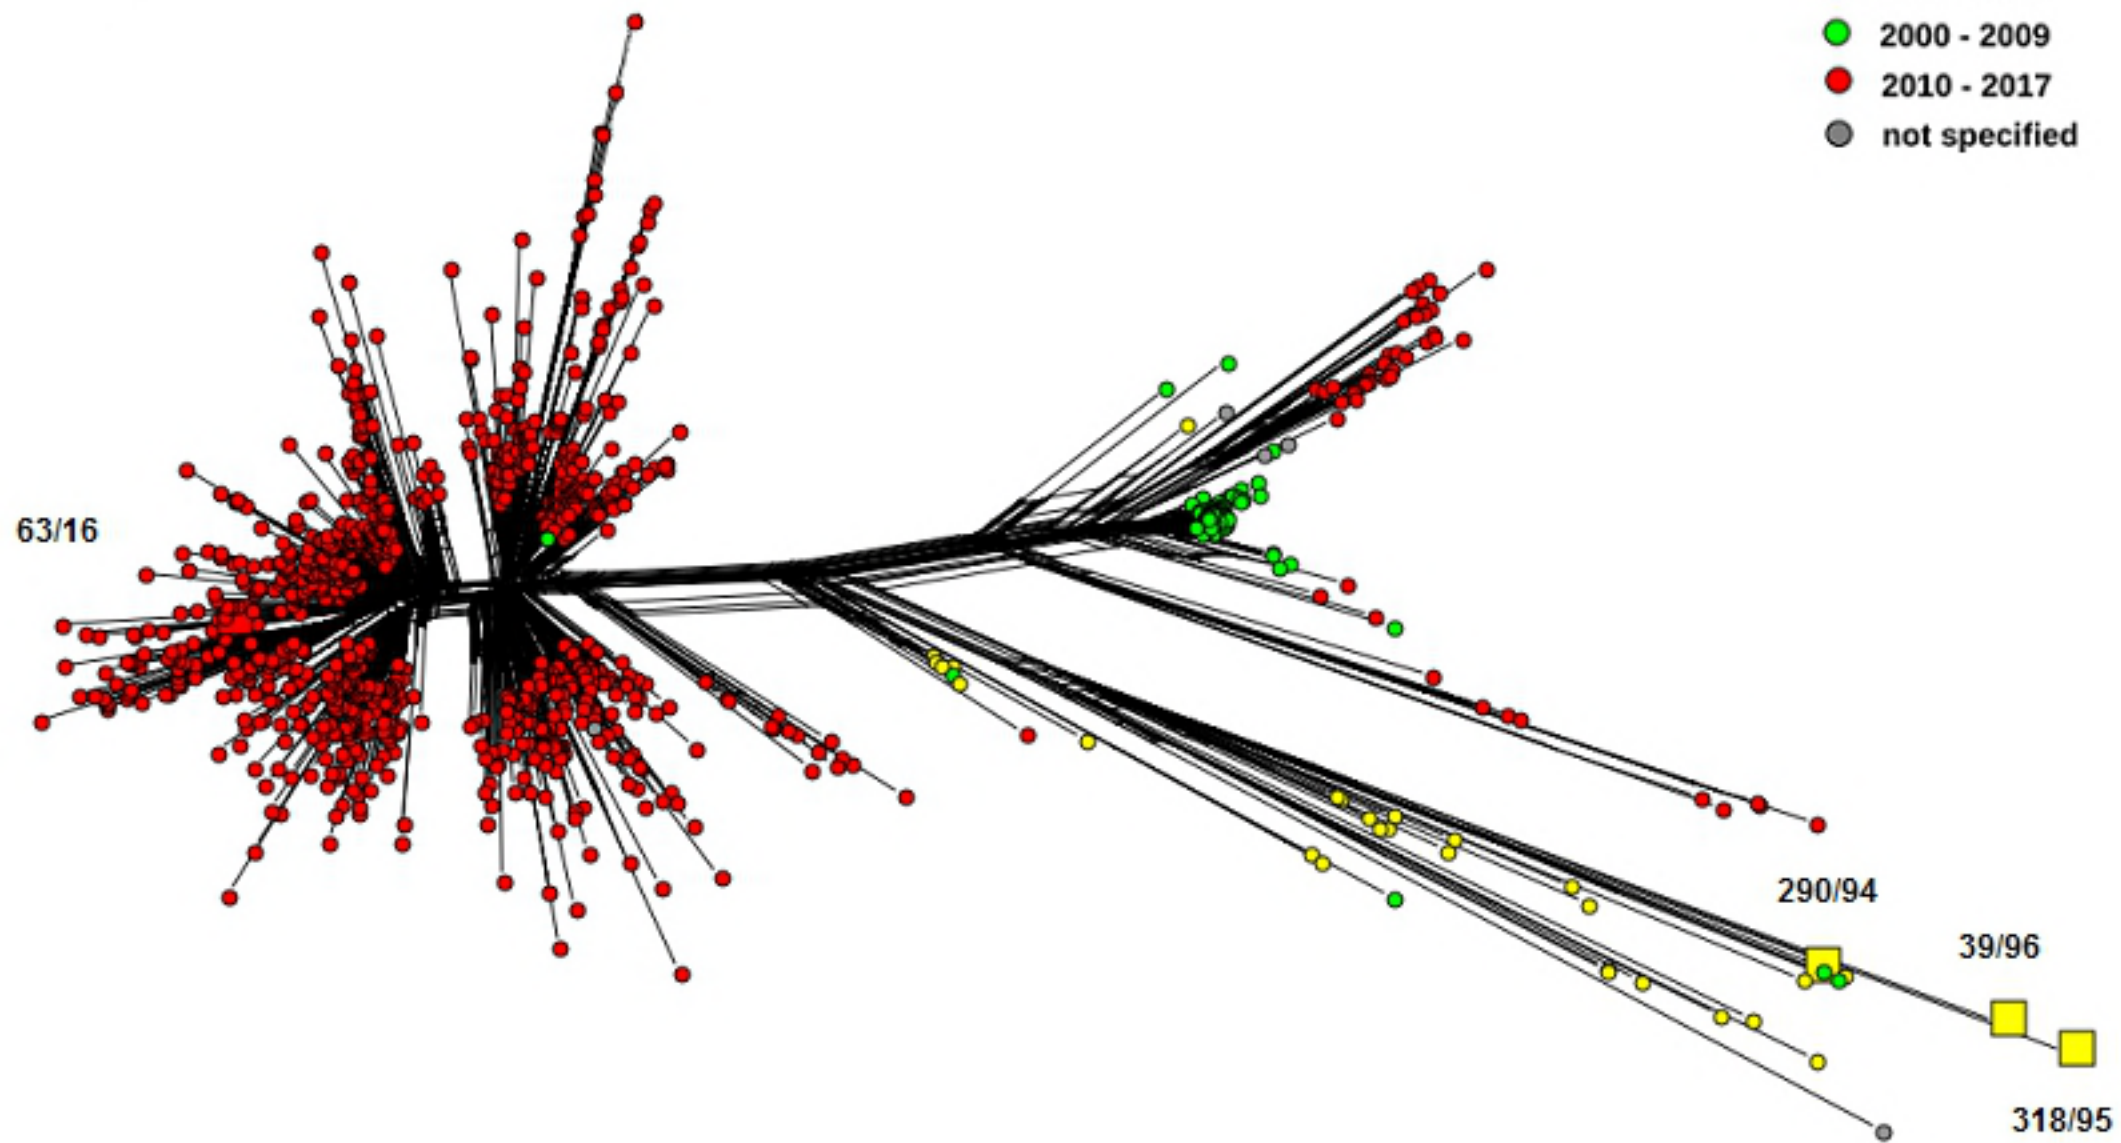

100.0

- 1982 - 1999
- 2000 - 2009
- 2010 - 2017
- not specified

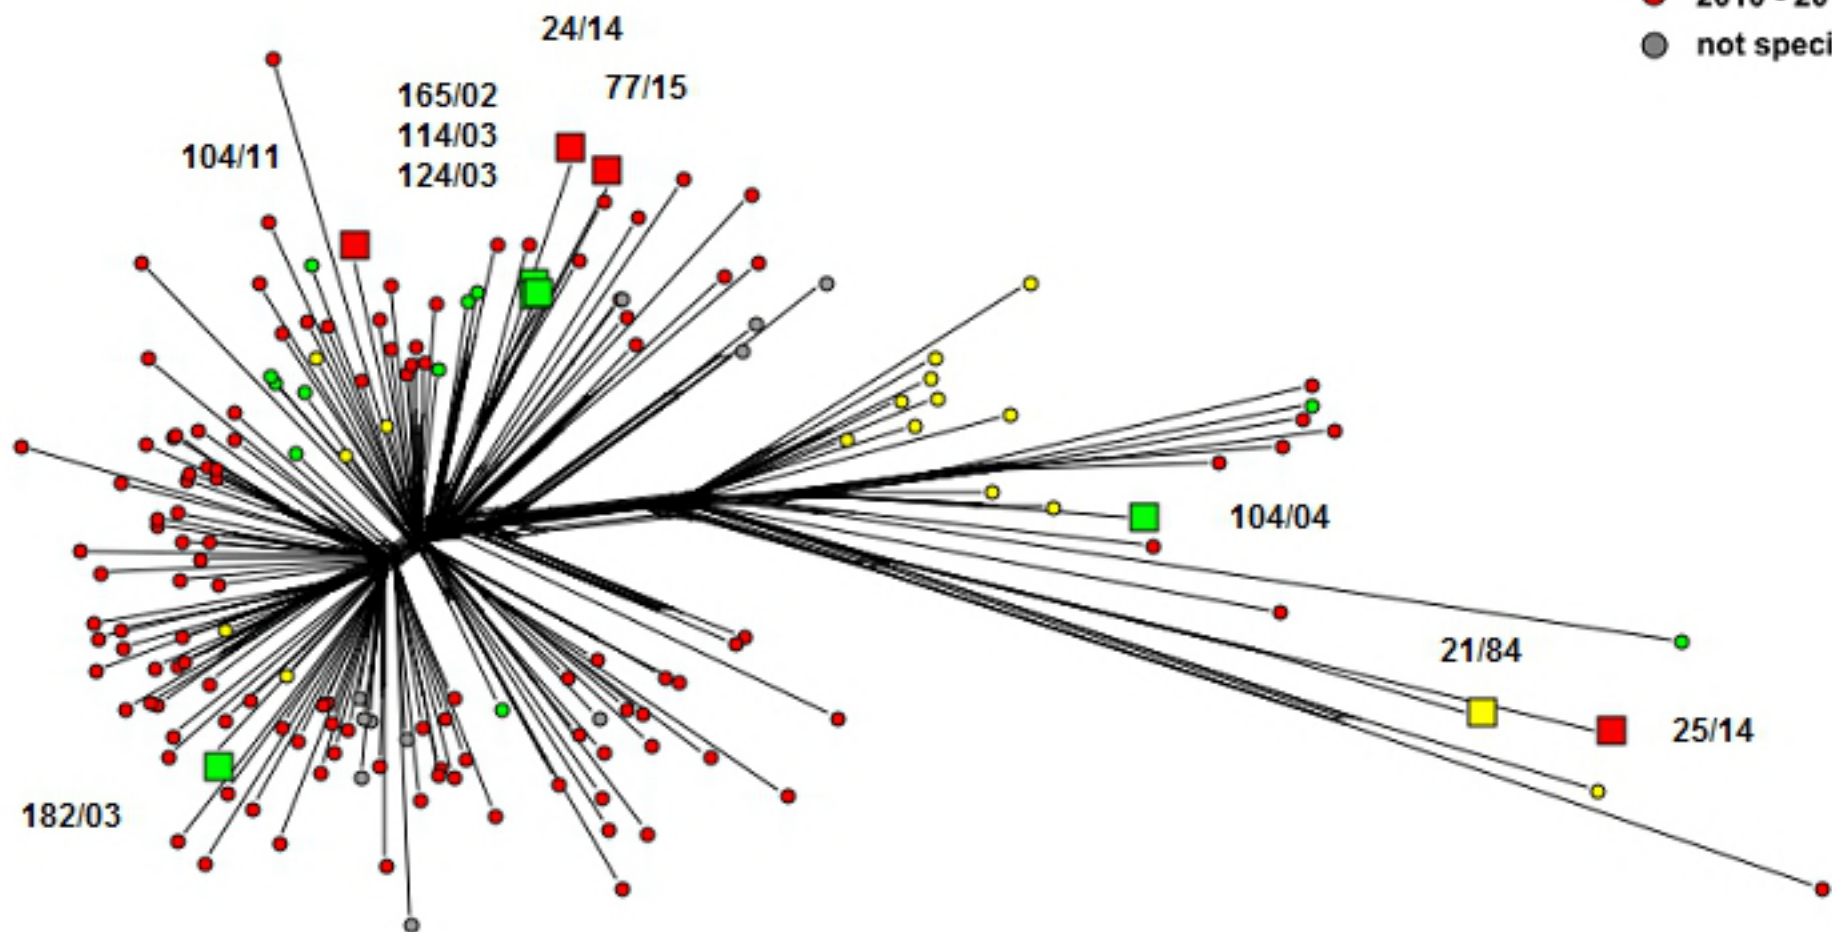

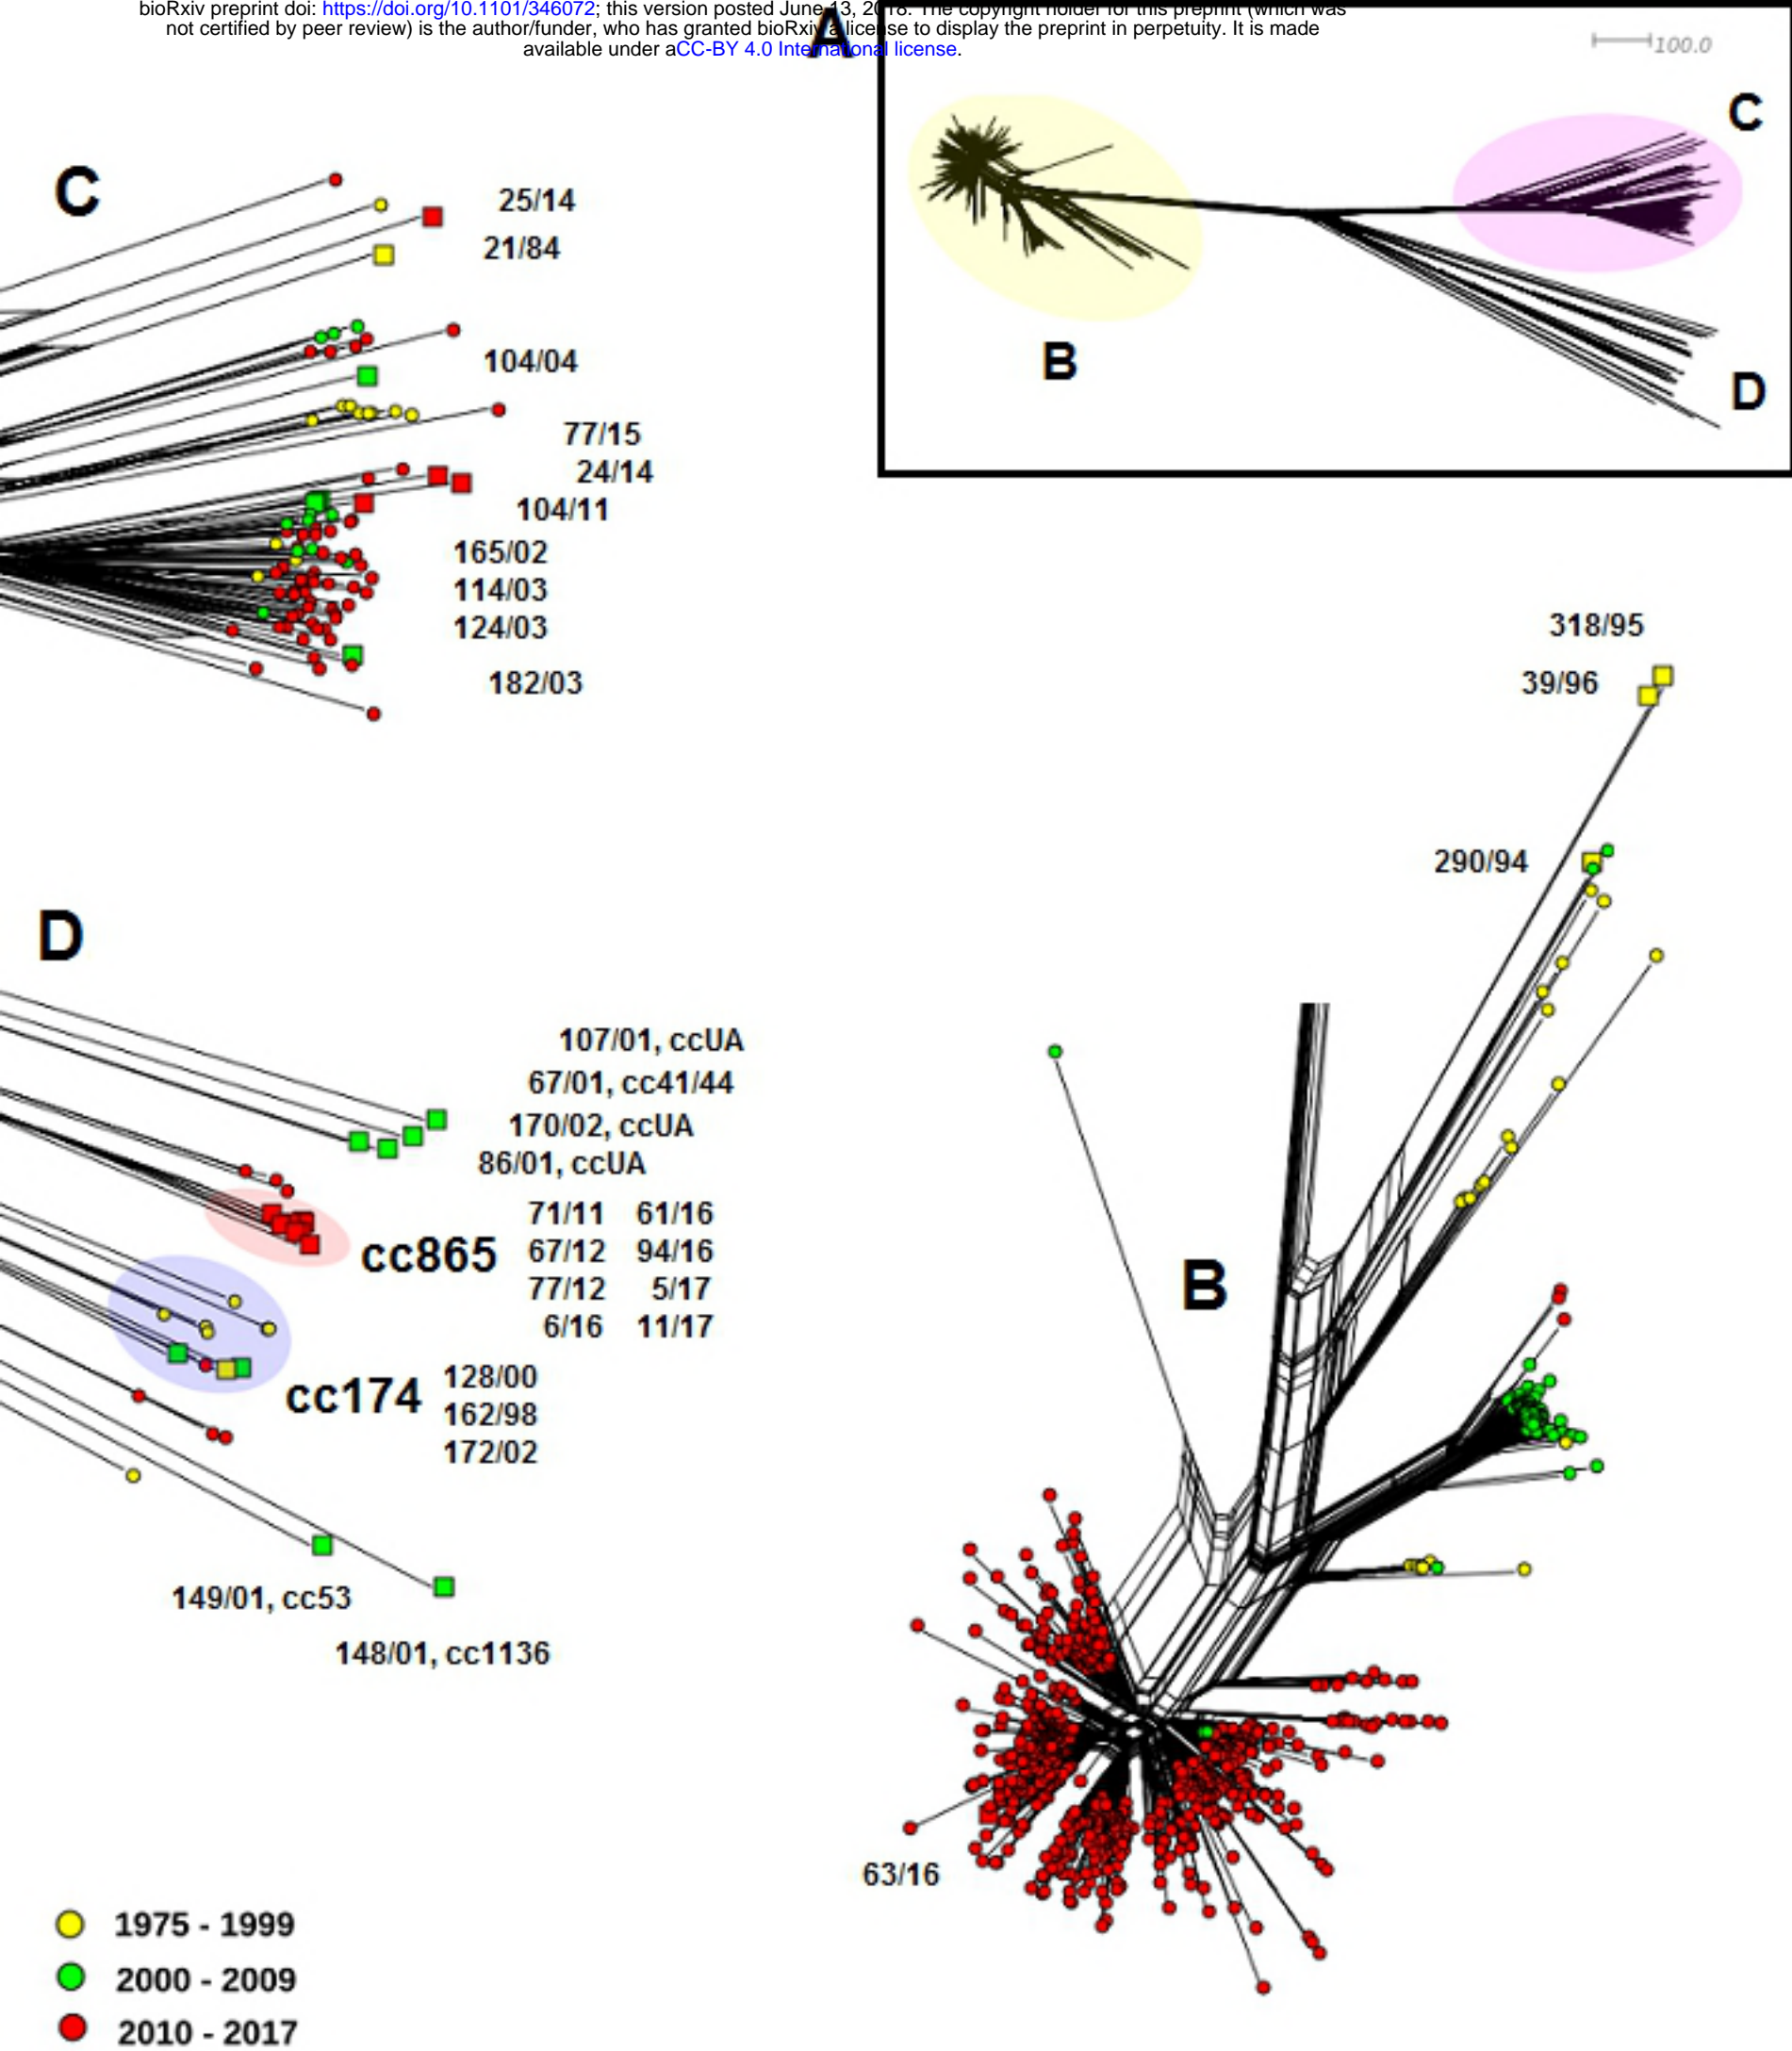

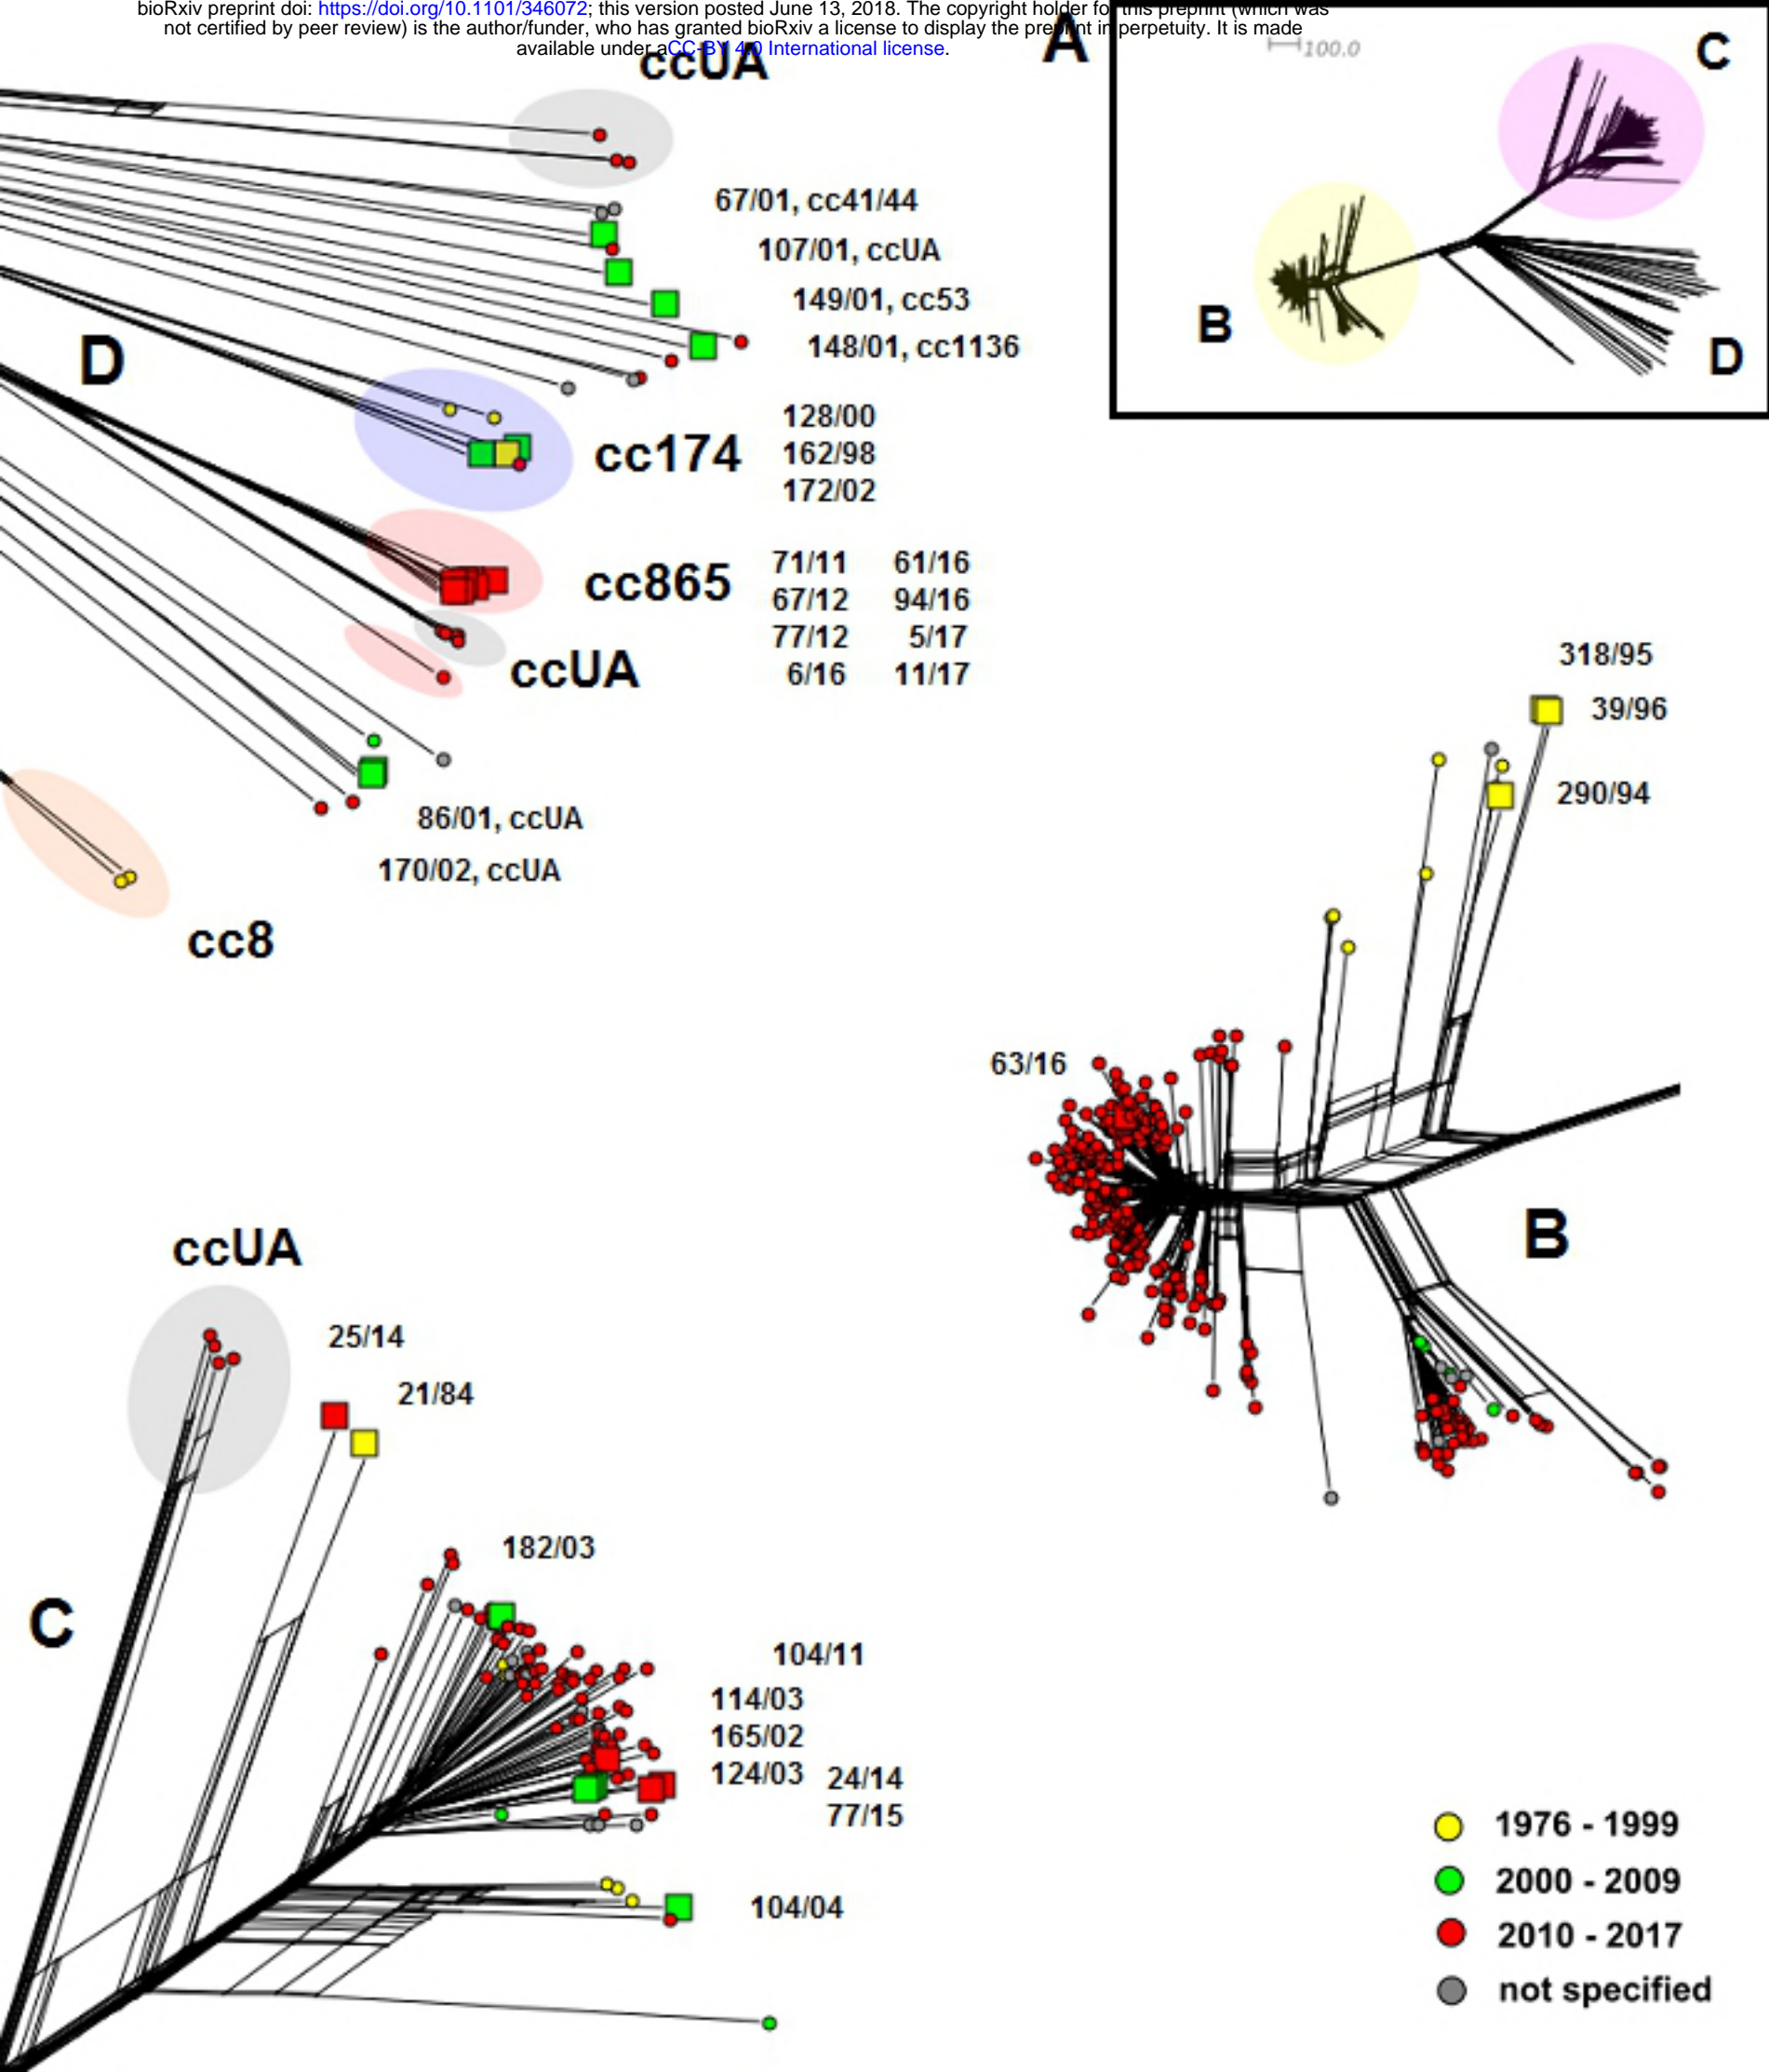

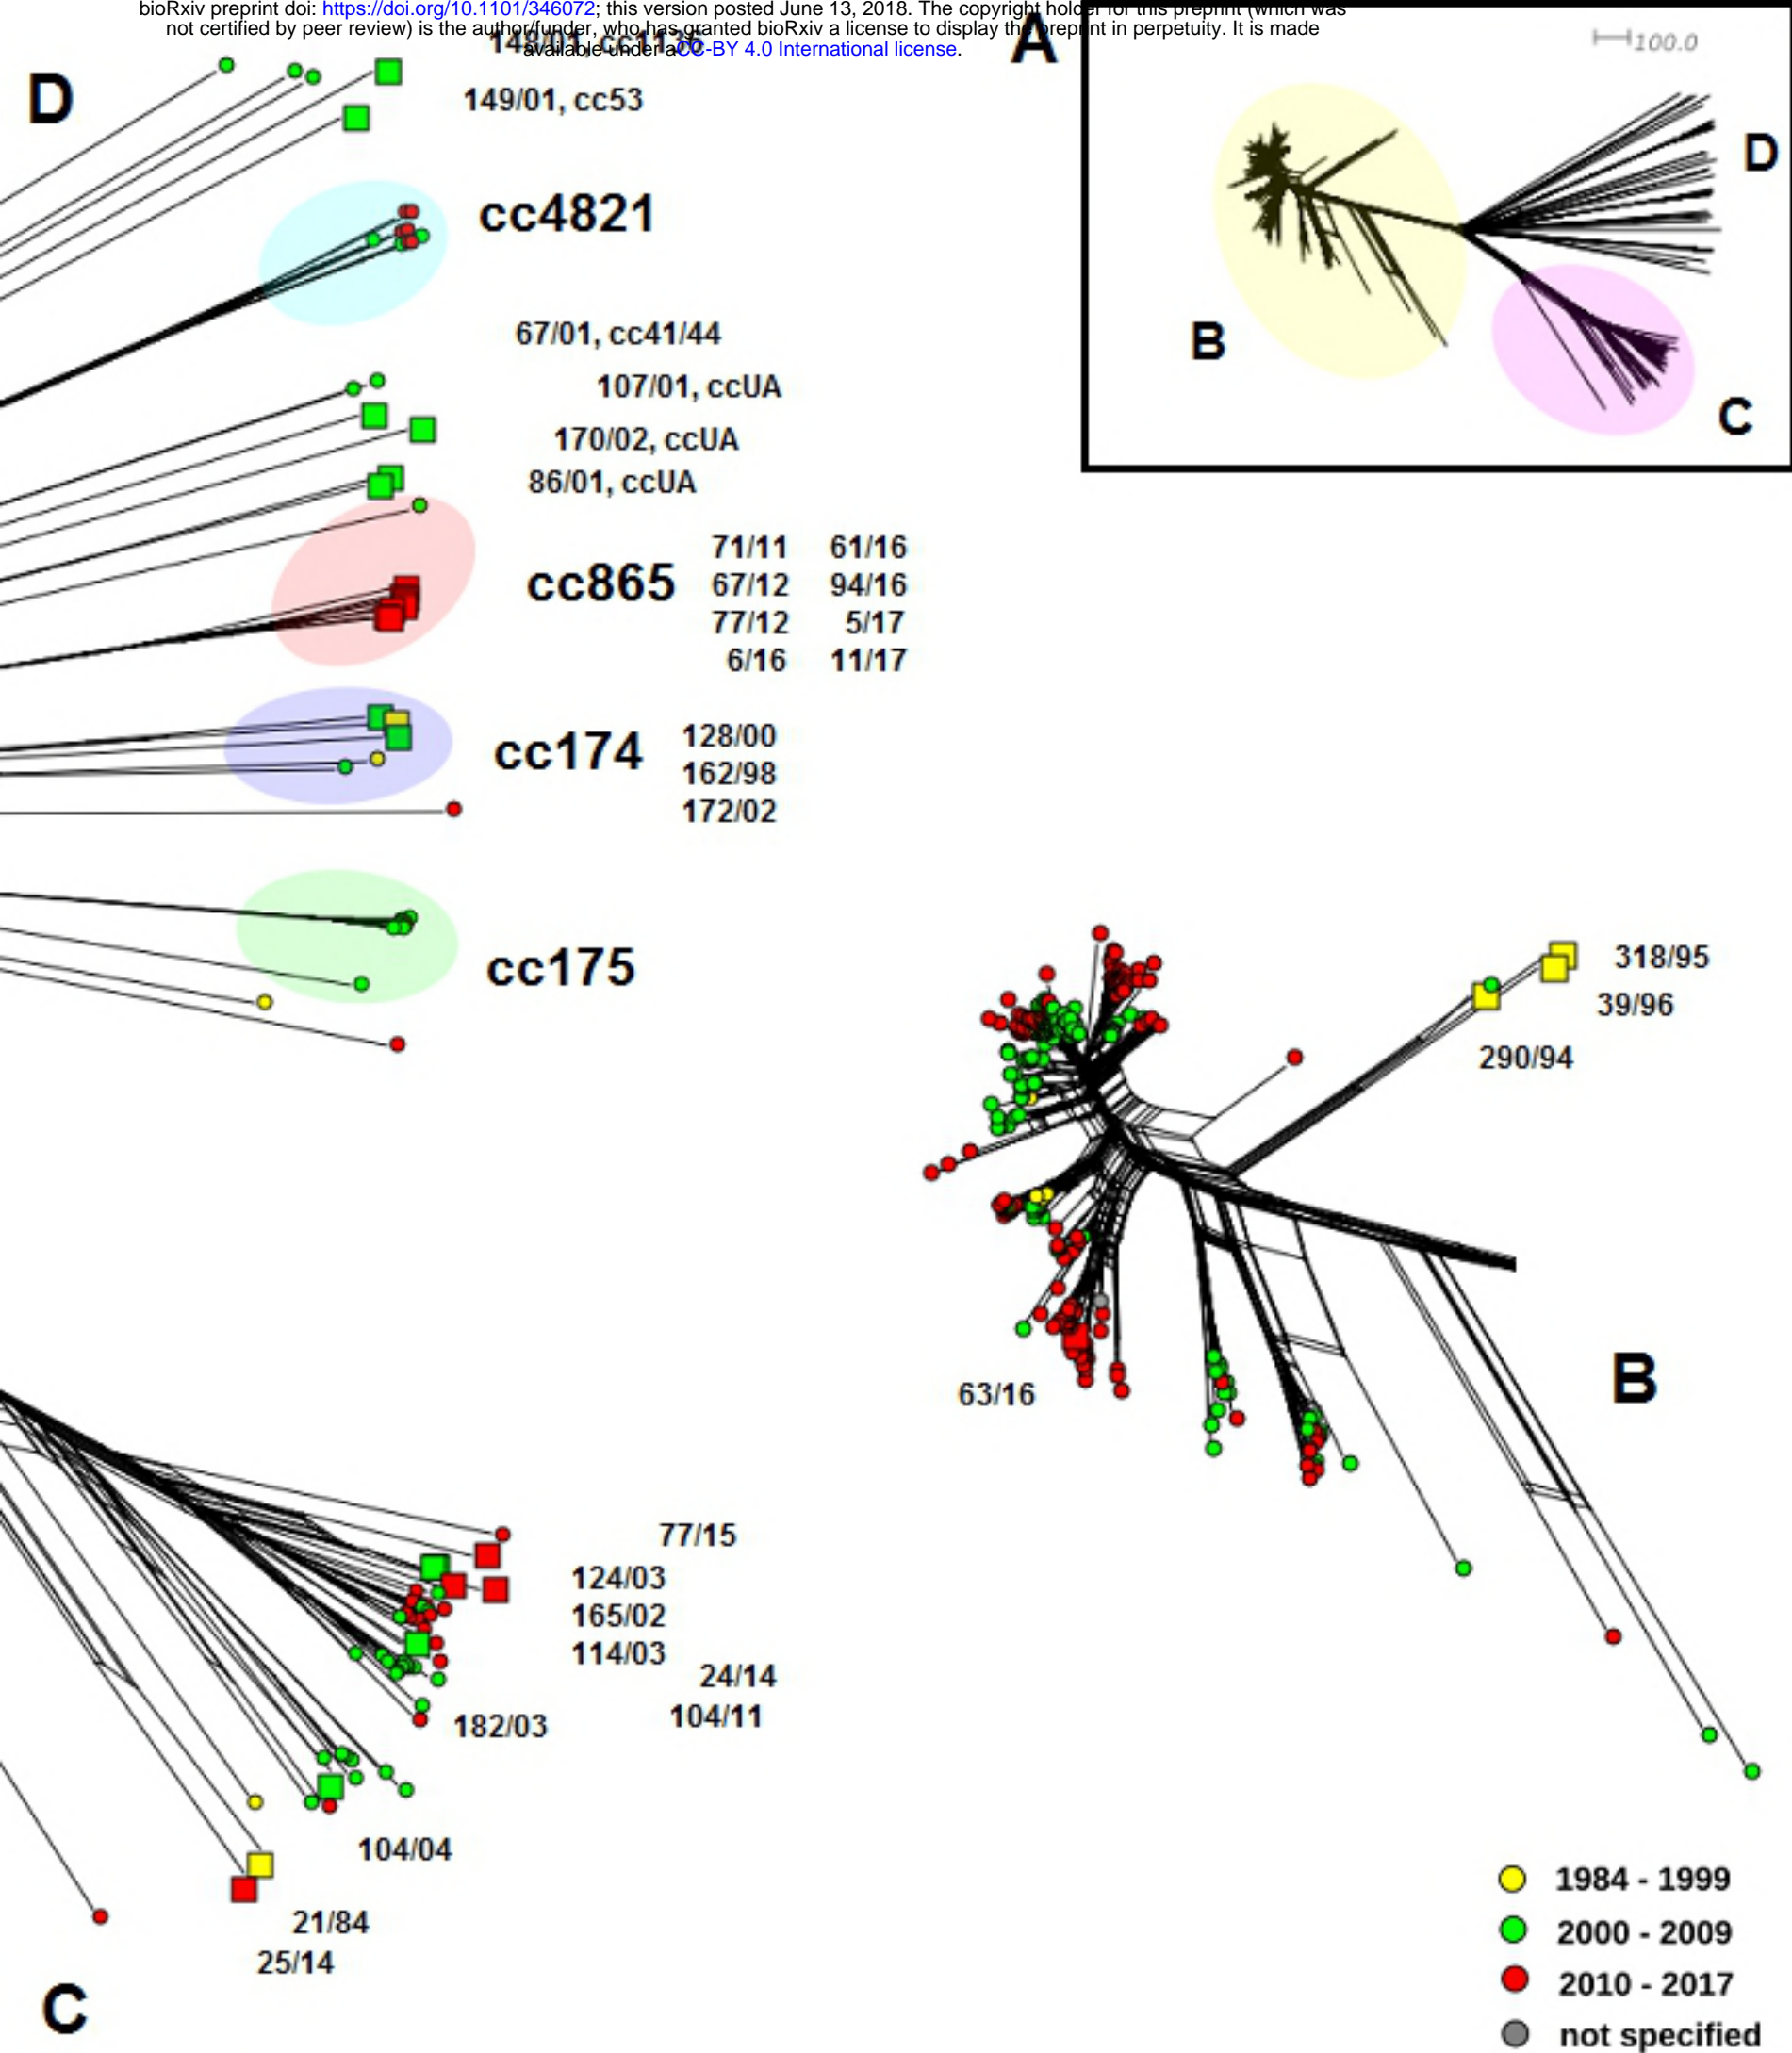

Source: https://www.biorxiv.org/content/10.1101/346072v1.full.pdf
